# Supplementary material for: The impact of curcumin derived polyphenols on the structure and flexibility COVID-19 main protease binding pocket: a molecular dynamics simulation study
Source: PeerJ. 2021 Jul 19;9:e11590. doi: 10.7717/peerj.11590 (PMC8297469; doi:10.7717/peerj.11590)
Supplement: Supplemental Information 2 [file peerj-09-11590-s002.xlsx]

## Sheet: Sheet1
1	0	0
2	3.2174	1.1454
3	3.2209	1.1542
4	3.2161	1.1342
5	3.1865	0.992
6	3.17	1.0661
7	3.2085	1.2174
8	3.2114	1.0618
9	3.2135	1.0947
10	3.2258	1.0396
11	3.2514	1.1429
12	3.3254	1.1556
13	3.343	1.1821
14	3.3472	1.1791
15	3.2999	1.1786
16	3.2915	1.0912
17	3.2979	1.1904
18	3.2661	1.067
19	3.2333	1.1735
20	3.2729	1.1144
21	3.2375	1.0321
22	3.1992	1.1697
23	3.2751	1.1048
24	3.2868	1.1719
25	3.3303	1.2602
26	3.349	1.2927
27	3.3849	1.1073
28	3.3722	1.1373
29	3.3308	1.1552
30	3.3966	1.0248
31	3.4687	1.1668
32	3.4894	1.1948
33	3.5248	1.2057
34	3.548	1.1884
35	3.5304	1.1658
36	3.5775	1.1244
37	3.6202	1.1168
38	3.6303	1.0866
39	3.5718	1.1377
40	3.5273	1.1516
41	3.5485	1.1143
42	3.5475	1.0383
43	3.5515	1.0838				1	0	0	0	0
44	3.5559	1.1295				2	0.0821	0.7939	3.2209	1.887
45	3.5526	1.1704				3	0.0854	0.7193	3.2161	1.807
46	3.5428	1.1228				4	0.0852	0.7248	3.1865	1.81
47	3.5308	1.0738				5	0.0834	0.6167	3.17	1.702
48	3.5461	1.2724				6	0.0855	0.5673	3.2085	1.743
49	3.5164	1.0496				7	0.0833	0.6663	3.2114	1.745
50	3.5321	1.2087				8	0.0862	0.667	3.2135	1.776
51	3.5815	1.1502				9	0.0848	0.667	3.2258	1.69
52	3.5696	1.1238				10	0.0838	0.4685	3.2514	1.68
53	3.5653	1.1632				11	0.0822	0.7246	3.3254	1.699
54	3.531	1.2788				12	0.0838	0.5659	3.343	1.717
54	3.5187	1.2841				13	0.0806	0.8157	3.3472	1.69
55	3.4741	1.23				14	0.0837	0.6533	3.2999	1.783
56	3.4861	0.9964				15	0.0853	0.8692	3.2915	1.683
57	3.533	1.1041				16	0.0829	0.6251	3.2979	1.701
58	3.569	0.9646				17	0.0836	0.6051	3.2661	1.678
59	3.588	1.0093				18	0.0873	0.6027	3.2333	1.674
60	3.555	1.0727				19	0.0826	0.587	3.2729	1.655
61	3.603	1.0297				20	0.0833	0.5956	3.2375	1.752
62	3.61	1.0169				21	0.0834	0.5419	3.1992	1.69
63	3.662	1.1823				22	0.0833	0.6788	3.2751	1.836
64	3.678	1.0772				23	0.0848	0.7994	3.2868	1.772
65	3.679	0.9372				24	0.0827	0.6581	3.3303	1.875
66	3.66	1.2131				25	0.0812	0.6782	3.349	1.854
67	3.621	1.4224				26	0.0858	0.6011	3.3849	1.822
68	3.645	1.0119				27	0.0839	0.706	3.3722	1.912
69	3.676	1.1008				28	0.0831	1.0834	3.3308	1.838
70	3.683	1.0475				29	0.0843	0.9344	3.3966	1.771
71	3.648	1.0739				30	0.0866	0.8118	3.4687	1.921
72	3.626	1.0215				31	0.4678	0.6297	3.4894	1.809
73	3.611	1.0065				32	0.5417	0.8145	3.5248	1.857
74	3.633	0.8924				33	0.6465	0.6442	3.548	1.864
75	3.692	0.9552				34	0.6307	0.8827	3.5304	1.899
76	3.679	1.0484				35	0.6223	0.824	3.5775	1.849
77	3.68	1.0784				36	0.643	0.7739	3.6202	1.774
78	3.691	1.1099				37	0.6892	0.6694	3.6303	1.797
79	3.613	1.0892				38	0.6409	0.7192	3.5718	1.807
80	3.576	1.0442				39	0.6746	0.7211	3.5273	1.778
81	3.575	1.0241				40	0.6832	0.7037	3.5485	1.987
82	3.63	1.1256				41	0.6771	0.9991	3.5475	1.887
83	3.604	1.0127				42	0.6673	0.9903	3.5515	1.779
84	3.621	1.0762				43	0.6871	0.7493	3.5559	1.81
85	3.652	1.1231				44	0.7383	0.9322	3.5526	1.892
86	3.668	1.1253				45	0.8023	1.0819	3.5428	1.774
87	3.648	1.0359				46	0.7314	1.1891	3.5308	1.88
88	3.649	1.1146				47	0.689	1.2745	3.5461	1.866
89	3.647	1.0747				48	0.7049	1.2446	3.5164	2.018
90	3.6	1.1265				49	0.6873	1.5304	3.5321	1.816
91	3.628	1.1074				50	0.7362	1.44	3.5815	1.833
92	3.605	1.1468				51	0.7057	1.438	3.5696	1.798
93	3.615	1.1644				52	0.7792	0.8056	3.5653	1.733
94	3.62	1.1463				53	0.7886	0.9842	3.531	1.665
95	3.62	1.2469				54	0.8202	1.1166	3.5187	1.69
96	3.618	1.1817				55	0.8479	1.0007	3.4741	1.735
97	3.604	1.0935				56	0.8808	1.053	3.4861	1.726
98	3.583	0.9923				57	0.8221	1.1286	3.533	1.871
99	3.521	1.0255				58	0.8193	0.8712	3.569	1.741
100	3.574	1.1299				59	0.7607	0.8972	3.588	1.856
101	3.602	1.0833				60	0.7841	0.8819	3.555	1.802
102	3.589	1.0914				61	0.804	0.7697	3.603	1.795
103	3.615	1.0631				62	0.8073	0.7981	3.61	1.779
104	3.638	1.1001				63	0.8062	0.8551	3.662	1.749
105	3.613	1.2312				64	0.8283	0.8641	3.678	1.757
106	3.613	1.1074				65	0.8039	0.7183	3.679	1.77
107	3.66	1.0582				66	0.8078	0.5188	3.66	1.772
108	3.697	1.035				67	0.7942	0.7877	3.621	1.81
109	3.666	1.0694				68	0.8014	0.712	3.645	1.791
110	3.647	1.0072				69	0.8443	0.8181	3.676	1.798
111	3.688	1.1757				70	0.786	0.8401	3.683	1.844
112	3.703	1.0264				71	0.8081	0.6133	3.648	1.76
113	3.71	1.0853				72	0.8306	0.7967	3.626	1.817
114	3.722	0.996				73	0.7722	0.7304	3.611	1.84
115	3.745	1.1581				74	0.7947	0.8622	3.633	1.732
116	3.699	1.0927				75	0.7475	0.9284	3.692	1.817
117	3.678	1.0991				76	0.7466	0.6313	3.679	1.69
118	3.686	1.1736				77	0.7829	0.9023	3.68	1.766
119	3.683	1.0994				78	0.8012	0.8538	3.691	1.711
120	3.717	1.1561				79	0.7861	0.7976	3.613	1.666
121	3.755	1.0016				80	0.8294	0.6273	3.576	1.805
122	3.746	0.9719				81	0.8372	0.6051	3.575	1.622
123	3.771	1.03				82	0.8168	0.6691	3.63	1.696
124	3.818	1.1295				83	0.8733	0.7525	3.604	1.87
125	3.777	1.1402				84	0.8741	0.6969	3.621	1.636
126	3.718	1.0858				85	0.8854	0.702	3.652	1.864
127	3.736	1.0653				86	0.8554	0.8636	3.668	1.753
128	3.745	1.0413				87	0.8852	0.7477	3.648	1.783
129	3.761	1.1281				88	0.9204	0.5647	3.649	1.792
130	3.715	1.1369				89	0.8352	0.6076	3.647	1.791
131	3.689	0.9697				90	0.8633	0.7563	3.6	1.648
132	3.623	1.0298				91	0.8447	0.7564	3.628	1.727
133	3.585	0.9526				92	0.8445	0.887	3.605	1.834
134	3.641	1.11				93	0.7765	0.8692	3.615	1.961
135	3.647	1.0424				94	0.7859	0.9804	3.62	1.878
136	3.644	1.0835				95	0.7621	0.8615	3.62	1.789
137	3.675	1.1395				96	0.7609	0.8139	3.618	1.782
138	3.674	1.1158				97	0.7821	0.938	3.604	1.789
139	3.614	1.1432				98	0.7639	1.2026	3.583	1.792
140	3.62	1.0881				99	0.8101	0.8334	3.521	1.842
141	3.634	1.0602				100	0.8081	0.962	3.574	1.744
142	3.648	1.1068				101	0.7774	1.0135	3.602	1.813
143	3.657	1.0497				102	0.7507	0.9941	3.589	1.816
144	3.668	1.1277				103	0.7855	1.1312	3.615	1.715
145	3.573	1.1558				104	0.837	1.0153	3.638	1.754
146	3.592	1.1361				105	0.8201	1.3121	3.613	1.902
147	3.585	1.1458				106	0.8261	1.264	3.613	1.817
148	3.582	1.1245				107	0.788	1.1181	3.66	1.896
149	3.604	1.0699				108	0.7551	0.8942	3.697	1.958
150	3.54	1.1334				109	0.7852	0.8914	3.666	1.868
151	3.546	1.1778				110	0.7664	0.9367	3.647	1.841
152	3.495	1.0561				111	0.8042	0.8954	3.688	1.723
153	3.504	1.0876				112	0.8028	0.8796	3.703	1.74
154	3.539	1.0536				113	0.8517	1.0213	3.71	1.738
155	3.545	1.0528				114	0.814	1.0395	3.722	1.704
156	3.552	1.13				115	0.7872	1.0412	3.745	1.699
157	3.547	1.1224				116	0.7828	0.8199	3.699	1.768
158	3.522	1.0507				117	0.8412	1.0202	3.678	1.777
159	3.523	2.2441				118	0.8544	1.1087	3.686	1.766
160	3.56	2.1315				119	0.9002	1.1006	3.683	1.766
161	3.539	2.1477				120	0.8284	1.2034	3.717	1.763
162	3.521	2.1939				121	0.7414	1.2407	3.755	1.831
163	3.515	2.2441				122	0.7232	1.5809	3.746	1.839
164	3.495	2.2862				123	0.7757	1.1072	3.771	1.802
165	3.533	2.2686				124	0.8519	0.8958	3.818	1.867
166	3.535	2.1718				125	0.8741	1.0361	3.777	1.844
167	3.563	2.2045				126	0.8544	0.8253	3.718	1.877
168	3.552	2.1393				127	0.8435	0.8336	3.736	1.798
169	3.55	2.1934				128	0.8599	0.8242	3.745	1.827
170	3.523	2.1875				129	0.8078	0.8574	3.761	1.857
171	3.534	2.3013				130	0.8125	1.1808	3.715	1.807
172	3.566	2.2722				131	0.8152	0.8331	3.689	1.801
173	3.563	2.2514				132	0.8223	0.8711	3.623	1.823
174	3.595	2.1879				133	0.7803	0.9294	3.585	1.798
175	3.584	2.1711				134	0.819	1.0205	3.641	1.804
176	3.637	2.1855				135	0.8444	0.8478	3.647	1.761
177	3.661	2.1023				136	0.8989	0.9956	3.644	1.832
178	3.648	2.0707				137	0.893	0.882	3.675	1.759
179	3.618	2.0447				138	0.9301	0.7906	3.674	1.913
180	3.585	2.0492				139	0.9083	0.9905	3.614	1.67
181	3.565	2.0285				140	0.8912	0.8081	3.62	1.843
182	3.569	2.0519				141	0.8972	0.936	3.634	1.883
183	3.566	2.0198				142	0.8654	0.8854	3.648	1.818
184	3.518	2.0096				143	0.8636	0.805	3.657	1.799
185	3.524	2.0286				144	0.888	0.623	3.668	1.773
186	3.521	2.0211				145	0.9362	0.8387	3.573	1.856
187	3.575	1.9962				146	0.9243	0.817	3.592	1.788
188	3.602	2.0528				147	0.9008	0.7475	3.585	1.787
189	3.64	2.0968				148	0.9701	1.0372	3.582	1.803
190	3.651	2.0013				149	0.9961	0.7529	3.604	1.821
191	3.674	2.0129				150	0.9527	0.6581	3.54	1.788
192	3.673	2.0461				151	0.9653	0.5504	3.546	1.775
193	3.657	2.0305				152	0.9531	0.4774	3.495	1.681
194	3.651	2.004				153	1.015	0.5838	3.504	1.806
195	3.662	2.021				154	0.9698	0.6774	3.539	1.766
196	3.661	1.9627				155	0.9582	0.7216	3.545	1.68
197	3.637	1.9959				156	0.9479	0.4496	3.552	1.727
198	3.612	1.9559				157	1.0011	0.6154	3.547	1.746
199	3.608	1.9627				158	0.9867	0.573	3.522	1.754
200	3.667	1.9852				159	1.0206	0.4414	3.523	1.828
201	3.616	1.971				160	1.0028	0.4143	3.56	1.841
202	3.629	2.0992				161	0.9361	0.4277	3.539	1.792
203	3.566	2.1409				162	0.9425	0.5318	3.521	1.797
204	3.6	2.0709				163	0.9693	0.58	3.515	1.747
205	3.652	2.0455				164	1.0283	0.6479	3.495	1.829
206	3.667	1.9637				165	1.008	0.747	3.533	1.852
207	3.683	1.9116				166	1.0233	0.6242	3.535	1.857
208	3.648	1.9683				167	1.0072	0.4741	3.563	1.87
209	3.664	2.0004				168	1.1028	0.3507	3.552	1.893
210	3.67	1.9767				169	1.0426	0.6808	3.55	1.812
211	3.684	1.9495				170	1.0081	0.5101	3.523	1.781
212	3.654	1.9662				171	1.0505	0.6894	3.534	1.789
213	3.641	1.8906				172	1.1121	0.8895	3.566	1.749
214	3.6	1.9554				173	1.0924	0.8277	3.563	1.79
215	3.537	1.9547				174	1.0854	0.7639	3.595	1.772
216	3.488	1.9136				175	1.0786	0.6705	3.584	1.765
217	3.5	1.8951				176	1.1254	0.7039	3.637	1.824
218	3.521	1.887				177	1.0504	0.5752	3.661	1.844
219	3.532	1.8321				178	1.0438	0.59	3.648	1.778
220	3.565	1.8901				179	1.0209	1.0122	3.618	1.863
221	3.541	1.7946				180	1.0321	0.6125	3.585	1.905
222	3.524	1.7781				181	0.9792	0.7244	3.565	1.799
223	3.497	1.7286				182	0.9315	0.7371	3.569	1.845
224	3.458	1.7248				183	0.8896	0.8051	3.566	1.845
225	3.469	1.7947				184	0.9899	0.9033	3.518	1.829
226	3.479	1.8605				185	0.9343	0.654	3.524	1.716
227	3.428	1.8285				186	0.9835	0.7367	3.521	1.769
228	3.441	1.7751				187	0.978	0.9141	3.575	1.771
229	3.477	1.8148				188	1.0157	0.777	3.602	1.661
230	3.461	1.8177				189	0.9685	0.8067	3.64	1.752
231	3.472	1.7625				190	0.9696	0.9498	3.651	1.693
232	3.477	1.696				191	0.9316	0.5698	3.674	1.825
233	3.523	1.7156				192	1.0051	0.9205	3.673	1.703
234	3.506	1.7929				193	0.9909	0.9001	3.657	1.82
235	3.538	1.7818				194	0.9721	0.5055	3.651	1.645
236	3.584	1.8167				195	1.01	1.211	3.662	1.677
237	3.537	1.7583				196	1.0218	1.0947	3.661	1.669
238	3.516	1.7486				197	0.9502	0.9288	3.637	1.776
239	3.542	1.7739				198	0.9103	0.9249	3.612	1.675
240	3.54	1.8042				199	0.9053	0.925	3.608	1.79
241	3.546	1.7918				200	0.9186	0.9119	3.667	1.766
242	3.573	1.7537				201	0.9388	0.939	3.616	1.704
243	3.538	1.7448				202	0.894	0.9675	3.629	1.65
244	3.552	1.8063				203	0.9339	0.8528	3.566	1.743
245	3.555	1.8336				204	0.9378	0.9404	3.6	1.639
246	3.548	1.8516				205	0.9761	0.8343	3.652	1.664
247	3.527	1.8914				206	1.0137	0.7896	3.667	1.671
248	3.591	1.9877				207	0.9945	0.7904	3.683	1.777
249	3.571	2.0408				208	1.005	0.7302	3.648	1.714
250	3.609	2.0349				209	0.9239	0.6128	3.664	1.842
251	3.601	2.0402				210	0.9588	0.9794	3.67	1.803
252	3.606	2.0223				211	0.9288	0.8168	3.684	1.788
253	3.554	1.9871				212	0.8867	1.1861	3.654	1.782
254	3.56	1.9862				213	0.8882	1.0091	3.641	1.708
255	3.586	1.8969				214	0.9433	0.8375	3.6	1.803
256	3.547	1.8961				215	0.8697	1.0735	3.537	1.744
257	3.505	1.9014				216	0.9288	0.8762	3.488	1.874
258	3.538	1.8734				217	0.9874	0.8242	3.5	1.766
259	3.594	1.8354				218	0.9722	0.7508	3.521	1.638
260	3.615	1.8919				219	0.9404	0.7672	3.532	1.753
261	3.623	1.9718				220	0.9579	0.6911	3.565	1.703
262	3.644	1.9714				221	0.9207	0.5283	3.541	1.826
263	3.665	1.9388				222	0.9191	0.6042	3.524	1.76
264	3.691	1.9452				223	0.8244	0.426	3.497	1.683
265	3.639	1.9188				224	0.8622	0.5728	3.458	1.706
266	3.652	1.9296				225	0.8844	0.7554	3.469	1.681
267	3.655	1.955				226	0.9392	0.6959	3.479	1.769
268	3.682	1.9048				227	0.9162	0.6729	3.428	1.67
269	3.7	1.933				228	0.9118	0.6286	3.441	1.729
270	3.671	1.9257				229	0.9396	0.8469	3.477	1.808
271	3.673	1.9643				230	0.8831	0.8389	3.461	1.704
272	3.684	2.0197				231	0.891	0.6519	3.472	1.686
273	3.651	2.0276				232	0.8799	0.7236	3.477	1.727
274	3.648	1.9787				233	0.9427	0.8402	3.523	1.821
275	3.665	2.0284				234	0.9312	0.8621	3.506	1.791
276	3.668	2.043				235	0.9005	0.7204	3.538	1.602
277	3.68	2.0213				236	0.8789	0.7681	3.584	1.775
278	3.678	1.9724				237	0.866	0.7947	3.537	1.748
279	3.726	1.0543				238	0.8529	0.748	3.516	1.774
280	3.694	1.0874				239	0.8168	0.8306	3.542	1.661
281	3.711	1.0291				240	0.8466	0.6211	3.54	1.679
282	3.726	1.1277				241	0.8609	0.4247	3.546	1.71
283	3.723	1.1157				242	0.8157	0.632	3.573	1.739
284	3.738	1.0291				243	0.847	0.527	3.538	1.804
285	3.771	1.0976				244	0.8832	0.4958	3.552	1.731
286	3.763	1.0659				245	0.9074	0.3263	3.555	1.817
287	3.768	1.1597				246	0.997	0.6128	3.548	1.869
288	3.753	1.1279				247	0.9872	0.6232	3.527	1.709
289	3.737	1.1052				248	1.002	0.7411	3.591	1.838
290	3.704	1.085				249	0.9868	0.6027	3.571	1.724
291	3.696	1.1754				250	1.0055	0.6803	3.609	1.781
292	3.621	1.1251				251	0.9956	0.6719	3.601	1.676
293	3.644	1.0919				252	0.9599	0.8206	3.606	1.656
294	3.662	1.1599				253	0.9932	0.9373	3.554	1.778
295	3.642	1.1914				254	1.0847	0.9852	3.56	1.862
296	3.608	1.1226				255	0.9782	1.0811	3.586	1.776
297	3.576	1.1985				256	0.9752	1.0761	3.547	1.777
298	3.578	1.2168				257	0.974	1.1949	3.505	1.74
299	3.614	1.1504				258	0.9667	1.2293	3.538	1.799
300	3.55	1.1739				259	0.9686	1.1399	3.594	1.862
301	3.535	1.1368				260	1.0154	0.9725	3.615	1.732
302	3.524	1.2241				261	1.0636	1.2208	3.623	1.786
303	3.551	1.2483				262	1.0701	1.1141	3.644	1.751
304	3.528	1.1865				263	1.1578	1.0222	3.665	1.814
305	3.507	1.1707				264	1.1369	1.0398	3.691	1.702
306	3.479	1.1788				265	1.1777	1.3361	3.639	1.744
307	3.478	1.1064				266	1.1643	1.0314	3.652	1.703
308	3.479	1.1405				267	1.1347	1.0212	3.655	1.677
309	3.462	1.1339				268	1.1044	1.0909	3.682	1.739
310	3.454	1.0704				269	1.1324	1.0557	3.7	1.695
311	3.449	1.1252				270	1.1199	0.9561	3.671	1.704
312	3.463	1.1531				271	1.1999	0.6851	3.673	1.661
313	3.467	1.1639				272	1.185	0.9346	3.684	1.6
314	3.472	1.1719				273	1.1981	0.8189	3.651	1.694
315	3.466	1.0756				274	1.1627	0.9638	3.648	1.692
316	3.464	1.0354				275	1.0513	1.071	3.665	1.659
317	3.453	1.0669				276	1.1076	0.9852	3.668	1.884
318	3.498	1.0072				277	1.1323	1.0642	3.68	1.799
319	3.523	1.0201				278	1.1486	0.8862	3.678	1.825
320	3.531	1.0708				279	1.0895	1.0381	3.726	1.854
321	3.524	1.0888				280	1.0238	1.2268	3.694	1.759
322	3.548	1.0976				281	1.0187	1.2013	3.711	1.75
323	3.527	1.1774				282	1.055	1.109	3.726	1.857
324	3.526	1.1183				283	1.0547	1.2494	3.723	1.882
325	3.553	1.1677				284	1.0711	1.1138	3.738	1.828
326	3.536	1.1733				285	1.0225	1.1409	3.771	1.901
327	3.495	1.0729				286	1.1104	1.0299	3.763	1.852
328	3.493	1.1105				287	1.0404	0.9226	3.768	1.874
329	3.533	1.0179				288	1.0319	1.0384	3.753	1.788
330	3.509	1.0358				289	1.0659	0.9433	3.737	1.806
331	3.503	1.0167				290	1.017	0.9556	3.704	1.789
332	3.425	1.0604				291	1.043	0.9261	3.696	1.893
333	3.426	1.0983				292	1.0429	1.0454	3.621	1.858
334	3.48	1.1312				293	0.9623	0.9841	3.644	1.722
335	3.412	1.1493				294	1.0241	0.9281	3.662	1.709
336	3.462	1.1112				295	1.0132	0.8252	3.642	1.713
337	3.428	1.1102				296	1.108	1.4281	3.608	1.635
338	3.419	1.1514				297	1.0631	1.1125	3.576	1.727
339	3.439	1.087				298	1.0825	0.8778	3.578	1.762
340	3.457	1.0317				299	1.0784	0.8642	3.614	1.626
341	3.513	1.1097				300	0.9839	1.0869	3.55	1.761
342	3.545	1.0735				301	1.0273	1.1346	3.535	1.685
343	3.542	1.055				302	0.9577	1.2902	3.524	1.743
344	3.556	1.0057				303	0.9653	1.485	3.551	1.793
345	3.539	0.9383				304	0.9605	1.3679	3.528	1.817
346	3.565	0.9412				305	0.9185	1.3037	3.507	1.707
347	3.573	0.9737				306	0.9134	1.2504	3.479	1.749
348	3.569	1.0148				307	0.8999	1.2666	3.478	1.77
349	3.608	1.0326				308	0.8942	1.1466	3.479	1.737
350	3.581	1.0135				309	0.9384	1.0505	3.462	1.764
351	3.54	1.0145				310	0.9456	1.1394	3.454	1.623
352	3.53	0.9951				311	0.9076	1.1684	3.449	1.648
353	3.553	1.0711				312	0.8503	1.145	3.463	1.739
354	3.572	1.0479				313	0.8621	1.2833	3.467	1.726
355	3.57	1.1213				314	0.8791	1.292	3.472	1.655
356	3.565	1.0402				315	0.8805	1.031	3.466	1.733
357	3.534	1.0877				316	0.9453	1.1288	3.464	1.813
358	3.559	1.1266				317	0.9444	1.2049	3.453	1.885
359	3.603	1.0528				318	0.9488	1.1397	3.498	1.776
360	3.607	1.0298				319	1.036	1.1458	3.523	1.731
361	3.582	0.9954				320	1.0135	1.0669	3.531	1.804
362	3.623	0.9872				321	0.9871	1.2149	3.524	1.887
363	3.606	0.9536				322	0.9621	1.2686	3.548	1.74
364	3.618	0.9773				323	1.0449	0.9118	3.527	1.688
365	3.64	1.071				324	1.0062	1.0229	3.526	1.664
366	3.67	1.0798				325	0.9543	1.1528	3.553	1.832
367	3.634	1.0689				326	0.9572	1.1227	3.536	1.705
368	3.644	1.1172				327	0.9672	1.0931	3.495	1.752
369	3.57	1.0781				328	1.0099	1.2839	3.493	1.814
370	3.577	1.037				329	1.0265	1.1791	3.533	1.743
371	3.59	1.0291				330	0.9613	1.147	3.509	1.874
372	3.64	1.0525				331	0.9976	1.1236	3.503	1.787
373	3.649	1.0977				332	0.9088	1.3383	3.425	1.788
374	3.634	1.049				333	0.9619	1.0702	3.426	1.805
375	3.599	1.0734				334	0.9361	1.141	3.48	1.911
376	3.567	1.1168				335	0.9817	0.9975	3.412	1.725
377	3.599	1.1186				336	0.9723	1.0864	3.462	1.707
378	3.561	1.0949				337	0.918	1.0634	3.428	1.698
379	3.585	1.127				338	0.8792	1.2638	3.419	1.67
380	3.622	1.0742				339	0.864	1.0469	3.439	1.743
381	3.609	1.0501				340	0.8775	1.2357	3.457	1.697
382	3.608	0.9858				341	0.8936	1.1382	3.513	1.628
383	3.595	1.0331				342	0.9313	1.0801	3.545	1.719
384	3.624	1.0601				343	0.9353	1.136	3.542	1.851
385	3.612	1.0324				344	0.9761	1.2654	3.556	1.754
386	3.591	1.0798				345	0.953	1.1467	3.539	1.692
387	3.579	1.1474				346	0.949	1.0045	3.565	1.872
388	3.554	1.1334				347	0.8869	1.1319	3.573	1.786
389	3.562	1.1335				348	0.8831	0.9756	3.569	1.771
390	3.591	1.2304				349	0.8781	1.1677	3.608	1.817
391	3.62	1.2816				350	0.9247	1.0357	3.581	1.8
392	3.631	1.2823				351	0.903	1.1789	3.54	1.824
393	3.629	1.2402				352	0.9017	1.1315	3.53	1.645
394	3.62	1.2087				353	0.8695	1.5088	3.553	1.773
395	3.666	1.186				354	0.9472	1.2005	3.572	1.933
396	3.672	1.2315				355	0.9468	1.6326	3.57	1.76
397	3.664	1.1177				356	0.9576	1.5502	3.565	1.72
398	3.622	1.1317				357	0.9272	1.4559	3.534	1.78
399	3.581	1.1529				358	0.9463	1.6069	3.559	1.819
400	3.613	1.1629				359	0.9251	1.3685	3.603	1.854
401	3.615	1.2459				360	1.0044	1.4624	3.607	1.797
402	3.578	1.1634				361	0.9845	1.656	3.582	1.678
403	3.612	1.1666				362	0.9362	1.4963	3.623	1.676
404	3.64	1.201				363	0.9872	1.5225	3.606	1.728
405	3.644	1.2287				364	0.906	1.5112	3.618	1.634
406	3.668	1.1537				365	0.8895	1.4857	3.64	1.631
407	3.681	1.2248				366	0.8653	1.6111	3.67	1.681
408	3.682	1.1632				367	0.9696	1.5557	3.634	1.668
409	3.712	1.1606				368	0.9934	1.3855	3.644	1.788
410	3.7	1.2003				369	0.9722	1.3115	3.57	1.745
411	3.704	1.1718				370	1	1.4398	3.577	1.685
412	3.691	1.1417				371	0.9434	1.5944	3.59	1.832
413	3.667	1.1652				372	0.9849	1.5833	3.64	1.689
414	3.619	1.1206				373	0.9755	1.2575	3.649	1.708
415	3.587	1.1331				374	0.9869	1.5896	3.634	1.752
416	3.602	1.151				375	0.9299	1.4097	3.599	1.775
417	3.608	1.1869				376	0.9274	1.6483	3.567	1.624
418	3.602	1.1429				377	0.9314	1.7207	3.599	1.707
419	3.577	1.106				378	0.9512	1.5932	3.561	1.803
420	3.56	1.0831				379	0.8674	1.4218	3.585	1.733
421	3.508	1.071				380	0.9382	1.3804	3.622	1.772
422	3.542	1.1628				381	0.8978	1.5849	3.609	1.788
423	3.549	1.1674				382	0.8755	1.4726	3.608	1.791
424	3.558	1.1767				383	0.9081	1.3984	3.595	1.663
425	3.536	1.1783				384	0.8405	1.6281	3.624	1.705
426	3.538	1.1577				385	0.9128	1.4615	3.612	1.722
427	3.525	1.1118				386	0.9196	1.3446	3.591	1.729
428	3.502	1.1239				387	0.8376	1.5392	3.579	1.676
429	3.468	1.1897				388	0.8864	1.3394	3.554	1.733
430	3.495	1.2343				389	0.9115	1.5884	3.562	1.739
431	3.508	1.165				390	0.9427	1.3992	3.591	1.732
432	3.525	1.1253				391	0.96	1.3793	3.62	1.637
433	3.478	1.1934				392	0.9035	1.261	3.631	1.848
434	3.482	1.1979				393	0.866	1.4803	3.629	1.856
435	3.503	1.0864				394	0.8916	1.6321	3.62	1.772
436	3.535	1.0445				395	0.918	1.336	3.666	1.887
437	3.578	1.1747				396	0.9604	1.4263	3.672	1.721
438	3.576	1.2009				397	0.972	1.257	3.664	1.763
439	3.56	1.207				398	0.9181	1.2527	3.622	1.759
440	3.521	1.1906				399	0.9492	1.3945	3.581	1.748
441	3.523	1.2219				400	0.937	1.3884	3.613	1.774
442	3.481	1.1789				401	0.968	1.6208	3.615	1.804
443	3.44	1.2275				402	0.99	1.6369	3.578	1.882
444	3.444	1.2586				403	0.9563	1.6531	3.612	1.703
445	3.482	1.2388				404	0.9524	1.5442	3.64	1.803
446	3.475	1.2349				405	0.9363	1.4695	3.644	1.721
447	3.446	1.2401				406	0.931	1.6092	3.668	1.629
448	3.405	1.313				407	0.9911	1.5392	3.681	1.7
449	3.359	1.3266				408	1.0352	1.5942	3.682	1.624
450	3.378	1.3004				409	1.0117	1.5662	3.712	1.657
451	3.407	1.3078				410	0.9562	1.5957	3.7	1.768
452	3.431	1.2851				411	0.9596	1.222	3.704	1.695
453	3.413	1.3125				412	0.9648	1.4172	3.691	1.654
454	3.477	1.1841				413	0.9336	1.398	3.667	1.673
455	3.471	1.2535				414	0.9218	1.4004	3.619	1.592
456	3.503	1.2296				415	0.9162	1.4477	3.587	1.631
457	3.494	1.2105				416	0.9188	1.5622	3.602	1.704
458	3.517	1.263				417	0.872	1.7654	3.608	1.667
459	3.535	1.3518				418	0.8885	1.5006	3.602	1.809
460	3.538	1.4105				419	0.9238	1.6099	3.577	1.798
461	3.524	1.4433				420	0.9769	1.4975	3.56	1.669
462	3.511	1.3689				421	1.0123	1.4427	3.508	1.759
463	3.571	1.3757				422	1.0314	1.4637	3.542	1.626
464	3.531	1.3638				423	0.9812	1.3031	3.549	1.599
465	3.511	1.3691				424	1.0042	1.6325	3.558	1.701
466	3.497	1.3704				425	0.9951	1.334	3.536	1.621
467	3.567	1.4061				426	1.1019	1.5428	3.538	1.65
468	3.561	1.3109				427	1.0975	1.159	3.525	1.553
469	3.631	1.3556				428	1.1371	0.9168	3.502	1.661
470	3.649	1.3902				429	1.0634	1.2438	3.468	1.616
471	3.615	1.3841				430	1.0499	1.2482	3.495	1.656
472	3.574	1.38				431	0.9769	1.2258	3.508	1.703
473	3.522	1.3134				432	0.9933	1.2115	3.525	1.627
474	3.502	1.3277				433	1.0562	1.2307	3.478	1.699
475	3.53	1.3818				434	1.0162	0.8398	3.482	1.793
476	3.531	1.2909				435	0.9597	1.0035	3.503	1.715
477	3.528	1.2416				436	0.9963	1.2167	3.535	1.796
478	3.534	1.2376				437	0.9942	1.1568	3.578	1.653
479	3.508	1.2564				438	1.0585	1.0547	3.576	1.774
480	3.517	1.171				439	0.9844	1.0361	3.56	1.835
481	3.52	1.1775				440	1.0077	1.0483	3.521	1.69
482	3.509	1.1761				441	0.9939	1.0474	3.523	1.799
483	3.52	1.25				442	1.0248	1.0956	3.481	1.842
484	3.517	1.223				443	0.9626	1.1563	3.44	1.856
485	3.53	1.245				444	0.9498	1.0087	3.444	1.802
486	3.527	1.295				445	0.9176	1.1666	3.482	1.935
487	3.537	1.3393				446	0.9915	1.1539	3.475	1.919
488	3.549	1.3658				447	0.9498	1.011	3.446	2.112
489	3.572	1.3641				448	0.8829	0.9352	3.405	1.936
490	3.593	1.4185				449	0.8879	0.9786	3.359	1.759
491	3.59	1.3329				450	0.8874	1.0493	3.378	1.764
492	3.604	1.2614				451	0.8593	1.0169	3.407	1.808
493	3.652	1.2258				452	0.9142	1.2145	3.431	1.77
494	3.658	1.23				453	0.8675	1.3201	3.413	1.844
495	3.625	1.2178				454	0.9529	1.2478	3.477	1.79
496	3.636	1.1811				455	1.0267	1.2564	3.471	1.766
497	3.597	1.1847				456	1.048	1.1719	3.503	1.719
498	3.58	1.19				457	0.964	1.4063	3.494	1.874
499	3.587	1.1823				458	1.0089	1.2545	3.517	1.712
500	3.565	1.1989				459	0.9926	1.3056	3.535	1.788
501	3.565	1.2081				460	0.8904	1.1404	3.538	1.728
502	3.534	1.2909				461	0.9043	1.2637	3.524	1.63
503	3.549	1.2272				462	0.8754	1.1024	3.511	1.669
504	3.591	1.2862				463	0.9043	1.0527	3.571	1.765
505	3.583	1.3482				464	0.9027	1.1048	3.531	1.649
506	3.589	1.3216				465	0.8677	1.2457	3.511	1.677
507	3.608	1.2991				466	0.8482	1.3361	3.497	1.662
508	3.63	1.2645				467	0.9283	1.1269	3.567	1.627
509	3.617	1.3294				468	0.9158	1.2179	3.561	1.752
510	3.592	1.3103				469	0.9842	1.1506	3.631	1.723
511	3.566	1.2993				470	0.9867	1.2198	3.649	1.671
512	3.585	1.2379				471	0.9688	1.3028	3.615	1.752
513	3.638	1.2868				472	0.9346	1.1617	3.574	1.724
514	3.633	1.2731				473	0.9126	1.2636	3.522	1.666
515	3.648	1.2644				474	0.9022	1.3488	3.502	1.703
516	3.678	1.2534				475	0.905	1.3299	3.53	1.718
517	3.659	1.2539				476	0.9576	0.0816	3.531	1.696
518	3.578	1.3515				477	0.9918	0.0829	3.528	1.735
519	3.642	1.4081				478	1.0342	0.083	3.534	1.669
520	3.65	1.343				479	1.0586	0.085	3.508	1.707
521	3.642	1.3031				480	1.0583	0.086	3.517	1.636
522	3.619	1.2254				481	1.0465	0.085	3.52	1.645
523	3.609	1.2781				482	1.0521	0.085	3.509	1.646
524	3.636	1.3045				483	1.1055	0.085	3.52	1.7
525	3.637	1.2332				484	1.1166	0.0829	3.517	1.695
526	3.631	1.2207				485	1.1477	0.083	3.53	1.676
527	3.694	1.2375				486	1.1584	0.085	3.527	1.726
528	3.747	1.2019				487	1.1785	0.0861	3.537	1.708
529	3.755	1.2019				488	1.2046	0.0851	3.549	1.721
530	3.748	1.1723				489	1.2078	0.0857	3.572	1.672
531	3.737	1.2376				490	1.2549	0.085	3.593	1.66
532	3.722	1.1732				491	1.2811	0.0852	3.59	1.771
533	3.693	1.1525				492	1.3257	0.0846	3.604	1.835
534	3.681	1.1492				493	1.3433	0.0847	3.652	1.703
535	3.662	1.1726				494	1.2833	0.0848	3.658	1.802
536	3.656	1.1961				495	1.3076	0.0878	3.625	1.684
537	3.691	1.1801				496	1.2551	0.088	3.636	1.735
538	3.702	1.218				497	1.2834	0.0861	3.597	1.717
539	3.717	1.185				498	1.2417	0.0838	3.58	1.843
540	3.735	1.1631				499	1.2436	0.0831	3.587	1.866
541	3.715	1.1924				500	1.2298	0.0837	3.565	1.92
542	3.736	1.1845				501	1.1966	0.0789	3.565	1.809
543	3.712	1.1344				502	1.1633	0.0822	3.534	1.791
544	3.746	1.1379				503	1.2661	0.0836	3.549	1.665
545	3.736	1.1588				504	1.2304	0.0849	3.591	1.77
546	3.731	1.2102				505	1.203	0.0827	3.583	1.785
547	3.728	1.2513				506	1.1222	0.0842	3.589	1.619
548	3.748	1.2395				507	1.1519	0.0859	3.608	1.68
549	3.706	1.2911				508	1.0913	0.0846	3.63	1.718
550	3.742	1.2479				509	1.0491	0.0815	3.617	1.809
551	3.749	1.3171				510	0.9486	0.085	3.592	1.742
552	3.772	1.3387				511	0.9738	0.082	3.566	1.696
553	3.803	1.2955				512	0.9597	0.5139	3.585	1.734
554	3.83	1.3198				513	0.9369	0.6656	3.638	1.724
555	3.814	1.3074				514	0.9128	0.6949	3.633	1.69
556	3.768	1.3721				515	0.8702	0.7584	3.648	1.753
557	3.786	1.3606				516	0.842	0.7762	3.678	1.848
558	3.798	1.3588				517	0.899	0.7878	3.659	1.668
559	3.795	1.41				518	0.9371	0.8267	3.578	1.638
560	3.795	1.3775				519	1.0081	0.8048	3.642	1.735
561	3.808	1.3325				520	1.0085	0.8879	3.65	1.655
562	3.816	1.3505				521	0.9891	0.8602	3.642	1.674
563	3.837	1.252				522	0.9561	0.8844	3.619	1.702
564	3.852	1.2558				523	0.9794	0.9083	3.609	1.651
565	3.837	1.2807				524	0.9096	0.94	3.636	1.593
566	3.82	1.3105				525	0.9322	0.9354	3.637	1.759
567	3.736	1.2238				526	0.9147	0.9605	3.631	1.71
568	3.782	1.2528				527	0.9105	0.928	3.694	1.668
569	3.794	1.1854				528	0.8908	0.8893	3.747	1.634
570	3.825	1.2657				529	0.9261	0.9156	3.755	1.667
571	3.848	1.3068				530	0.9209	0.8856	3.748	1.685
572	3.798	1.2809				531	0.8807	0.9452	3.737	1.648
573	3.819	1.2449				532	0.9216	0.9032	3.722	1.717
574	3.859	1.3189				533	0.974	0.9105	3.693	1.776
575	3.851	1.3162				534	0.9775	0.943	3.681	1.72
576	3.86	1.2913				535	1.023	0.9355	3.662	1.711
577	3.839	1.2772				536	0.9868	0.903	3.656	1.701
578	3.885	1.2175				537	0.956	0.9198	3.691	1.724
579	3.854	1.2348				538	0.9814	0.93	3.702	1.818
580	3.818	1.3305				539	0.9723	0.9162	3.717	1.959
581	3.816	1.2607				540	0.9581	0.8988	3.735	1.926
582	3.828	1.2649				541	0.8988	0.8342	3.715	1.892
583	3.823	1.2436				542	0.962	0.8371	3.736	1.802
584	3.812	1.2646				543	0.9039	0.8461	3.712	1.709
585	3.794	1.2955				544	0.9792	0.8602	3.746	1.665
586	3.798	1.2427				545	0.9345	0.8832	3.736	1.7
587	3.83	1.274				546	0.984	0.9315	3.731	1.704
588	3.857	1.2035				547	1.0035	0.9483	3.728	1.708
589	3.887	1.188				548	0.9939	0.9063	3.748	1.718
590	3.859	1.1888				549	0.9081	0.973	3.706	1.724
591	3.848	1.1008				550	0.917	0.969	3.742	1.728
592	3.845	1.1036				551	0.8914	0.9422	3.749	1.77
593	3.885	1.0838				552	0.9915	1.0093	3.772	1.659
594	3.894	1.0629				553	0.8984	0.9902	3.803	1.668
595	3.896	1.0866				554	0.9072	0.9844	3.83	1.669
596	3.916	1.1785				555	0.8916	0.9548	3.814	1.71
597	3.951	1.1915				556	0.9222	0.9281	3.768	1.771
598	3.945	1.1339				557	0.8979	0.8992	3.786	1.645
599	3.954	1.2104				558	0.9302	0.9029	3.798	1.693
600	3.949	1.2366				559	0.895	0.89	3.795	1.804
601	3.945	1.203				560	0.9645	0.9141	3.795	1.679
602	4.008	1.163				561	1.0159	0.9755	3.808	1.756
603	4.045	1.1954				562	1.0674	1.0169	3.816	1.758
604	4.049	1.1468				563	1.0103	1.0134	3.837	1.702
605	4.032	1.1831				564	1.0139	1.0175	3.852	1.789
606	4.019	1.2135				565	1.0367	1.0699	3.837	1.843
607	4.003	1.1895				566	1.0301	1.0188	3.82	1.842
608	3.989	1.2447				567	1.018	0.9844	3.736	1.828
609	3.943	1.2772				568	0.9828	1.0439	3.782	1.699
610	3.951	1.2594				569	0.9328	1.0085	3.794	1.926
611	3.918	1.2662				570	0.8899	1.0688	3.825	1.882
612	3.931	1.1967				571	0.9106	1.0576	3.848	1.866
613	3.934	1.2113				572	0.8398	1.0604	3.798	1.749
614	3.971	1.1358				573	0.8785	1.0373	3.819	1.727
615	3.965	1.2153				574	0.9803	1.0073	3.859	1.808
616	3.911	1.2584				575	0.9302	0.9672	3.851	1.722
617	3.872	1.2044				576	0.8901	0.9903	3.86	1.796
618	3.841	1.264				577	0.8993	0.9687	3.839	1.835
619	3.894	1.3349				578	0.9119	0.9623	3.885	1.774
620	3.903	1.2608				579	0.9037	0.9762	3.854	1.856
621	3.889	1.2443				580	0.9369	1.022	3.818	1.772
622	3.853	1.2399				581	0.9536	0.9774	3.816	1.745
623	3.861	1.2171				582	0.9945	0.9756	3.828	1.905
624	3.913	1.2722				583	0.9155	0.978	3.823	1.962
625	3.91	1.3522				584	0.9359	0.9848	3.812	1.942
626	3.863	1.2214				585	0.9245	1.0589	3.794	1.849
627	3.888	1.2688				586	0.921	1.0093	3.798	1.91
628	3.911	1.2284				587	0.9053	0.9978	3.83	1.819
629	3.889	1.2318				588	0.906	0.9985	3.857	1.867
630	3.809	1.2488				589	0.939	1.0025	3.887	1.734
631	3.834	1.1989				590	0.9134	0.9276	3.859	1.805
632	3.806	1.1473				591	0.9641	0.9482	3.848	1.697
633	3.84	1.1645				592	0.9719	0.9299	3.845	1.778
634	3.866	1.1675				593	0.9783	0.8964	3.885	1.632
635	3.903	1.2012				594	0.9815	0.909	3.894	1.717
636	3.905	1.1829				595	0.9575	0.9649	3.896	1.697
637	3.934	1.1673				596	0.9342	0.9902	3.916	1.801
638	3.904	1.1821				597	0.941	0.9876	3.951	1.912
639	3.86	1.1581				598	0.9354	0.9811	3.945	1.788
640	3.882	1.1345				599	0.9272	1.012	3.954	1.738
641	3.882	1.1442				600	0.9006	1.0289	3.949	1.72
642	3.862	1.1441				601	0.9296	1.0332	3.945	1.741
643	3.926	1.1353				602	0.8977	1.0266	4.008	1.624
644	3.972	1.1597				603	0.9564	1.0256	4.045	1.635
645	3.96	1.1727				604	1.0146	1.0574	4.049	1.696
646	3.975	1.2147				605	0.9959	1.0092	4.032	1.676
647	3.964	1.1663				606	1.0184	0.9843	4.019	1.688
648	3.925	1.0394				607	1.0043	1.0238	4.003	1.795
649	3.995	1.0556				608	1.019	0.9926	3.989	1.85
650	4.004	1.0719				609	0.9614	0.9672	3.943	1.7
651	4.03	1.0318				610	1.0706	0.9461	3.951	1.635
652	3.987	1.1082				611	1.0678	0.9142	3.918	1.612
653	3.999	1.1455				612	1.028	0.8751	3.931	1.691
654	3.988	1.1077				613	0.9566	0.8996	3.934	1.65
655	4.028	1.1036				614	1.0037	0.9284	3.971	1.772
656	4.004	1.0291				615	1.0218	1.043	3.965	1.739
657	3.986	1.0591				616	1.0003	0.9606	3.911	1.683
658	4.003	1.1088				617	0.9622	0.9802	3.872	1.716
659	3.989	1.0242				618	0.9592	0.9569	3.841	1.779
660	3.983	1.0442				619	0.9575	0.9213	3.894	1.622
661	3.95	1.1328				620	0.9901	0.9944	3.903	1.829
662	3.928	1.1021				621	0.9927	0.9664	3.889	1.761
663	3.951	1.1034				622	1.0046	1.0098	3.853	1.741
664	3.983	1.1519				623	0.9969	1	3.861	1.716
665	3.982	1.1394				624	0.9582	1.0124	3.913	1.62
666	3.978	1.2181				625	0.978	1.05	3.91	1.764
667	3.993	1.2193				626	0.9102	1.0339	3.863	1.691
668	3.994	1.242				627	0.9741	0.981	3.888	1.74
669	3.986	1.1607				628	1.0979	1.0121	3.911	1.749
670	4.007	1.1165				629	1.0332	0.9622	3.889	1.694
671	3.997	1.1209				630	1.0094	1.0291	3.809	1.608
672	3.991	1.1721				631	1.0361	0.9911	3.834	1.658
673	3.988	1.1149				632	1.0225	1.0566	3.806	1.691
674	3.965	1.1146				633	1.0183	1.0787	3.84	1.766
675	3.912	1.1047				634	1.0768	1.117	3.866	1.784
676	3.957	1.1218				635	1.0117	1.1731	3.903	1.858
677	3.959	1.1368				636	1.0646	1.2221	3.905	1.813
678	3.929	1.171				637	1.0877	1.1345	3.934	1.829
679	3.952	1.1069				638	1.0458	1.1482	3.904	1.707
680	3.976	1.2367				639	1.0374	1.1564	3.86	1.692
681	3.952	1.1821				640	1.0495	1.156	3.882	1.805
682	3.951	1.1792				641	1.0909	1.1599	3.882	1.867
683	4.013	1.2055				642	1.0901	1.1881	3.862	1.814
684	4.027	1.2161				643	1.0677	1.3037	3.926	1.855
685	4.048	1.3091				644	1.0732	1.2072	3.972	1.669
686	4.032	1.2418				645	1.0709	1.1836	3.96	1.639
687	3.99	1.2663				646	1.1134	1.2024	3.975	1.823
688	4.012	1.1759				647	1.0609	1.2316	3.964	1.821
689	3.997	1.1579				648	1.0957	1.2612	3.925	1.727
690	3.993	1.1415				649	1.0688	1.22	3.995	1.733
691	4.003	1.1887				650	1.0665	1.2624	4.004	1.827
692	4.012	1.2741				651	1.0694	1.2968	4.03	1.923
693	4.02	1.2016				652	1.114	1.291	3.987	1.929
694	3.946	1.2266				653	1.0756	1.2657	3.999	1.888
695	3.937	1.1926				654	1.1813	1.1921	3.988	1.741
696	3.958	1.247				655	1.1591	1.1824	4.028	1.731
697	3.99	1.2312				656	1.142	1.1287	4.004	1.711
698	4.009	1.2478				657	1.0928	1.1037	3.986	1.725
699	4.002	1.2592				658	1.09	1.1553	4.003	1.684
700	4	1.2676				659	1.0994	1.2002	3.989	1.69
701	3.974	1.3441				660	1.1486	1.1302	3.983	1.791
702	3.993	1.3959				661	1.1399	1.1363	3.95	1.736
703	3.982	1.2653				662	1.1053	1.2046	3.928	1.654
704	3.966	1.2484				663	1.0849	1.2318	3.951	1.722
705	3.974	1.1213				664	1.1217	1.2164	3.983	1.687
706	4.003	1.2343				665	1.0857	1.2294	3.982	1.739
707	4.007	1.2602				666	1.0713	1.2481	3.978	1.753
708	3.995	1.2414				667	1.0788	1.27	3.993	1.711
709	3.991	1.2458				668	1.1392	1.3664	3.994	1.892
710	4.012	1.2365				669	1.1122	1.2571	3.986	1.797
711	4.012	1.2146				670	1.1051	1.2531	4.007	1.792
712	4.021	1.1536				671	1.0718	1.2553	3.997	1.77
713	4.072	1.133				672	1.0879	1.2885	3.991	1.749
714	4.092	1.045				673	1.1666	1.3118	3.988	1.776
715	4.063	1.035				674	1.1753	1.3024	3.965	1.745
716	4.08	1.0159				675	1.1916	1.311	3.912	1.778
717	4.035	1.0429				676	1.2043	1.214	3.957	1.715
718	4.03	1.035				677	1.2365	1.2472	3.959	1.731
719	4.031	1.0255				678	1.2008	1.2774	3.929	1.701
720	4.033	1.0808				679	1.1554	1.2808	3.952	1.805
721	4.02	1.0613				680	1.1842	1.3049	3.976	1.848
722	3.993	1.0368				681	1.1693	1.3804	3.952	1.673
723	3.981	1.0045				682	1.1902	1.3818	3.951	1.683
724	4.034	1.0707				683	1.1678	1.3701	4.013	1.737
725	3.997	1.0746				684	1.1747	1.3475	4.027	1.646
726	3.99	1.1488				685	1.1079	1.329	4.048	1.673
727	3.966	1.1909				686	1.1129	1.3841	4.032	1.689
728	3.954	1.2727				687	1.0951	1.3303	3.99	1.726
729	3.982	1.2677				688	1.1014	1.378	4.012	1.709
730	3.958	1.2957				689	1.1515	1.3536	3.997	1.688
731	3.979	1.2601				690	1.1551	1.3638	3.993	1.75
732	4.046	1.2124				691	1.1706	1.3667	4.003	1.878
733	4.065	1.1919				692	1.1127	1.3672	4.012	1.724
734	4.034	1.2031				693	1.0788	1.3847	4.02	1.879
735	4.074	1.2209				694	1.1316	1.3847	3.946	1.737
736	4.015	1.1698				695	1.1765	1.3852	3.937	1.811
737	3.983	1.1388				696	1.2069	1.4135	3.958	1.832
738	3.974	1.0934				697	1.144	1.4013	3.99	1.83
739	3.996	1.15				698	1.113	1.3886	4.009	1.814
740	4.006	1.1523				699	1.1212	1.3682	4.002	1.786
741	4.017	1.1389				700	1.1065	1.3755	4	1.788
742	3.965	1.1388				701	1.1038	1.3232	3.974	1.824
743	3.985	1.0854				702	1.1009	1.313	3.993	1.808
744	3.986	1.1804				703	1.0819	1.3771	3.982	1.694
745	3.959	1.2313				704	1.0596	1.4208	3.966	1.732
746	3.971	1.1742				705	1.0151	1.472	3.974	1.732
747	3.992	1.1605				706	1.0547	1.4704	4.003	1.635
748	4.008	1.2087				707	1.0263	1.4738	4.007	1.796
749	4.05	1.2193				708	1.0931	1.5019	3.995	1.655
750	4.058	1.2335				709	1.1575	1.4306	3.991	1.705
751	4.084	1.2622				710	1.1431	1.4339	4.012	1.644
752	4.081	1.2123				711	1.1574	1.4719	4.012	1.664
753	4.108	1.2126				712	1.0191	1.5156	4.021	1.685
754	4.083	1.2462				713	1.047	1.4953	4.072	1.686
755	4.092	1.2021				714	1.0497	1.5084	4.092	1.652
756	4.115	1.1799				715	1.095	1.4287	4.063	1.66
757	4.139	1.1515				716	1.0753	1.386	4.08	1.752
758	4.164	1.187				717	1.0424	1.413	4.035	1.726
759	4.131	1.2027				718	1.0505	1.4507	4.03	1.737
760	4.093	1.2785				719	1.0407	1.4632	4.031	1.78
761	4.115	1.2661				720	1.0539	1.4148	4.033	1.829
762	4.108	1.254				721	1.0453	1.4527	4.02	1.699
763	4.039	1.1552				722	1.0461	1.4946	3.993	1.758
764	4.014	1.1427				723	1.0614	1.5187	3.981	1.784
765	4.007	1.1401				724	1.0668	1.5903	4.034	1.759
766	4.047	1.1905				725	1.1367	1.6143	3.997	1.756
767	4.094	1.2142				726	1.1159	1.4729	3.99	1.687
768	4.077	1.1952				727	1.1226	1.5553	3.966	1.714
769	4.133	1.1897				728	1.1173	1.4941	3.954	1.66
770	4.108	1.1845				729	1.0118	1.4942	3.982	1.745
771	4.076	1.1142				730	1.0243	1.4375	3.958	1.738
772	4.041	1.134				731	1.0477	1.4797	3.979	1.681
773	4.088	1.1732				732	1.0257	1.4801	4.046	1.71
774	4.125	1.1041				733	1.0461	1.4954	4.065	1.912
775	4.125	1.0984				734	1.0021	1.4605	4.034	1.838
776	4.126	1.088				735	1.0794	1.4709	4.074	1.685
777	4.092	1.1204				736	1.0044	1.5673	4.015	1.825
778	4.097	1.1614				737	1.0591	1.5351	3.983	1.707
779	4.111	1.1495				738	0.9597	1.5634	3.974	1.608
780	4.074	1.1114				739	1.0022	1.5874	3.996	1.618
781	4.065	1.122				740	1.0608	1.5562	4.006	1.72
782	4.11	1.1317				741	1.0565	1.4639	4.017	1.729
783	4.108	1.1147				742	0.9927	1.4809	3.965	1.651
784	4.072	1.0831				743	0.9741	1.5723	3.985	1.727
785	4.05	1.1686				744	1.0178	1.5789	3.986	1.698
786	4.059	1.104				745	0.9601	1.5571	3.959	1.787
787	4.074	1.1458				746	0.9355	1.4917	3.971	1.764
788	4.099	1.1498				747	0.9133	1.437	3.992	1.718
789	4.085	1.199				748	0.9191	1.3737	4.008	1.859
790	4.067	1.1502				749	0.9975	1.4341	4.05	1.704
791	4.043	1.1565				750	0.9576	1.412	4.058	1.636
792	4.061	1.1771				751	0.9431	1.4736	4.084	1.676
793	4.065	1.1688				752	1.0017	1.441	4.081	1.741
794	4.092	1.2195				753	1.0299	1.4107	4.108	1.767
795	4.114	1.296				754	1.0596	1.3395	4.083	1.69
796	4.098	1.2444				755	1.0562	1.3482	4.092	1.742
797	4.083	1.2608				756	1.0424	1.3457	4.115	1.687
798	4.083	1.2459				757	1.0667	1.3028	4.139	1.813
799	4.062	1.2354				758	1.0189	1.2675	4.164	1.649
800	4.001	1.2088				759	1.1063	1.3033	4.131	1.721
801	4.029	1.2722				760	1.0551	1.287	4.093	1.693
802	4.011	1.2729				761	1.0677	1.2393	4.115	1.591
803	4.03	1.2652				762	1.0683	1.2451	4.108	1.765
804	4.037	1.2747				763	1.0627	1.2454	4.039	1.73
805	4.022	1.2625				764	1.0617	1.204	4.014	1.637
806	4.015	1.2274				765	0.9817	1.2234	4.007	1.721
807	4.025	1.1827				766	1.0498	1.251	4.047	1.611
808	3.998	1.2042				767	1.0093	1.2815	4.094	1.601
809	4	1.1902				768	0.9991	1.2551	4.077	1.703
810	4.03	1.196				769	1.0047	1.1917	4.133	1.623
811	4.04	1.2311				770	1.0444	1.1828	4.108	1.618
812	4.08	1.2732				771	1.0861	1.1862	4.076	1.681
813	4.07	1.2529				772	1.0018	1.1663	4.041	1.706
814	4.03	1.213				773	1.0142	1.1322	4.088	1.838
815	4.01	1.1669				774	1.0015	1.1442	4.125	1.794
816	4.01	1.1946				775	0.9258	1.2762	4.125	1.73
817	4.04	1.2101				776	0.9578	1.3034	4.126	1.742
818	4.07	1.1783				777	0.9551	1.2909	4.092	1.779
819	4.01	1.1633				778	0.9311	1.2418	4.097	1.983
820	3.98	1.24				779	0.9767	1.2453	4.111	1.826
821	4.03	1.2672				780	0.9475	1.2354	4.074	1.793
822	4.02	1.2362				781	0.9553	1.2464	4.065	1.661
823	4.03	1.2779				782	0.9587	1.2421	4.11	1.765
824	4.05	1.2462				783	0.9406	1.2533	4.108	1.831
825	4.06	1.1966				784	0.8906	1.2577	4.072	1.572
826	4.11	1.1407				785	0.907	1.2472	4.05	1.745
827	4.15	1.1996				786	0.8621	1.2247	4.059	1.649
828	4.2	1.2165				787	0.9036	1.2836	4.074	1.845
829	4.22	1.1985				788	0.8925	1.2461	4.099	1.693
830	4.24	1.2087				789	0.8639	1.1967	4.085	1.741
831	4.19	1.2056				790	0.8664	1.1733	4.067	1.755
832	4.18	1.2377				791	0.881	1.2017	4.043	1.787
833	4.16	1.271				792	0.9484	1.2319	4.061	1.704
834	4.12	1.2897				793	0.9458	1.2806	4.065	1.711
835	4.13	1.2831				794	0.9119	1.2354	4.092	1.604
836	4.12	1.3257				795	0.9055	1.2853	4.114	1.618
837	4.08	1.3471				796	0.9434	1.2441	4.098	1.798
838	4.06	1.2813				797	0.9241	1.2157	4.083	1.727
839	4.08	1.3047				798	0.8994	1.1883	4.083	1.692
840	4.08	1.3766				799	0.926	1.216	4.062	1.751
841	4.06	1.3545				800	0.9101	1.2349	4.001	1.811
842	3.98	1.3608				801	0.9462	1.2554	4.029	1.715
843	3.99	1.3284				802	0.9627	1.2955	4.011	1.663
844	3.96	1.3156				803	0.9912	1.3291	4.03	1.801
845	4.04	1.3125				804	0.9642	1.3585	4.037	1.837
846	4.05	1.3246				805	0.9894	1.3871	4.022	1.846
847	4.01	1.3708				806	1.0171	1.3507	4.015	1.807
848	4	1.3373				807	1.0012	1.3808	4.025	1.882
849	4.08	1.3426				808	0.9705	1.2734	3.998	1.757
850	4.09	1.3344				809	0.9689	1.2445	4	1.908
851	4.13	1.37				810	0.9247	1.3301	4.03	1.816
852	4.11	1.3207				811	0.9589	1.3336	4.04	1.784
853	4.12	1.2602				812	1.0481	1.2771	4.08	1.86
854	4.12	1.2763				813	1.0017	1.3332	4.07	1.858
855	4.12	1.2251				814	1.029	1.3462	4.03	1.733
856	4.13	1.2708				815	1.0572	1.4073	4.01	1.824
857	4.19	1.2959				816	1.0963	1.4268	4.01	1.72
858	4.18	1.3232				817	1.0646	1.3668	4.04	1.687
859	4.22	1.3065				818	0.9709	1.4385	4.07	1.656
860	4.2	1.259				819	0.9706	1.3888	4.01	1.708
861	4.15	1.2431				820	0.8943	1.4379	3.98	1.692
862	4.16	1.2815				821	0.9293	1.4729	4.03	1.74
863	4.17	1.2374				822	0.9649	1.4378	4.02	1.722
864	4.17	1.2179				823	0.9395	1.463	4.03	1.672
865	4.17	1.2521				824	1.0109	1.4765	4.05	1.739
866	4.12	1.2389				825	1.0319	1.5115	4.06	1.774
867	4.13	1.1628				826	1.02	1.5129	4.11	1.736
868	4.14	1.1248				827	1.0661	1.4937	4.15	1.738
869	4.16	1.167				828	1.1258	1.539	4.2	1.719
870	4.18	1.1826				829	1.0913	1.5282	4.22	1.817
871	4.21	1.1704				830	1.0736	1.5381	4.24	1.725
872	4.22	1.1975				831	0.9764	1.5109	4.19	1.729
873	4.21	1.2113				832	1.02	1.4852	4.18	1.789
874	4.16	1.2192				833	0.9568	1.5104	4.16	1.86
875	4.13	1.3254				834	1.0221	1.4614	4.12	1.733
876	4.12	1.2588				835	1.0481	1.5062	4.13	1.694
877	4.12	1.2082				836	1.0082	1.4997	4.12	1.843
878	4.1	1.1788				837	1.0198	1.4689	4.08	1.902
879	4.04	1.2285				838	1.0538	1.4934	4.06	1.791
880	4.08	1.2173				839	0.974	1.4998	4.08	1.853
881	4.02	1.2281				840	1.005	1.4584	4.08	1.804
882	3.98	1.2094				841	1.0127	1.4589	4.06	1.813
883	3.92	1.2447				842	0.9735	1.5032	3.98	1.817
884	3.93	1.2009				843	1.0117	1.4599	3.99	1.865
885	3.96	1.2073				844	0.9886	1.3986	3.96	1.85
886	4	1.2093				845	0.974	1.4255	4.04	1.737
887	4.03	1.2268				846	0.9671	1.4675	4.05	1.855
888	4.04	1.2146				847	0.9385	1.4979	4.01	1.726
889	4.09	1.2299				848	0.9751	1.5418	4	1.727
890	4.13	1.2747				849	0.9178	1.5281	4.08	1.72
891	4.1	1.3089				850	0.9496	1.5336	4.09	1.922
892	4.1	1.2719				851	0.9541	1.5198	4.13	1.785
893	4.16	1.2492				852	0.8772	1.5044	4.11	1.723
894	4.21	1.2412				853	0.9222	1.4538	4.12	1.733
895	4.17	1.1889				854	0.9409	1.5122	4.12	1.724
896	4.18	1.1392				855	0.951	1.5745	4.12	1.69
897	4.18	1.1708				856	1.0234	1.5338	4.13	1.722
898	4.17	1.1412				857	0.9941	1.5706	4.19	1.864
899	4.17	1.2114				858	0.9549	1.5219	4.18	1.714
900	4.16	1.1575				859	1.0066	1.5404	4.22	1.73
901	4.15	1.202				860	0.9957	1.4855	4.2	1.714
902	4.12	1.246				861	0.9136	1.5049	4.15	1.79
903	6.09	1.218				862	0.912	1.502	4.16	1.733
904	6.09	1.2595				863	0.9227	1.4858	4.17	1.709
905	6.02	1.2849				864	0.9845	1.5257	4.17	1.708
906	6.07	1.3495				865	0.9372	1.4808	4.17	1.788
907	6.05	1.3046				866	0.9034	1.4177	4.12	1.716
908	6.04	1.3332				867	0.9201	1.4541	4.13	1.769
909	6.07	1.278				868	0.9198	1.5111	4.14	1.796
910	6.02	1.2312				869	0.9727	1.5781	4.16	1.758
911	5.99	1.2452				870	0.9743	1.573	4.18	1.832
912	6	1.2606				871	0.9361	1.5181	4.21	1.705
913	6.04	1.2727				872	0.9021	1.5345	4.22	1.782
914	6.04	1.3059				873	0.8356	1.6219	4.21	1.706
915	5.98	1.2755				874	0.9038	1.6273	4.16	1.767
916	6.02	1.3097				875	0.9235	1.6631	4.13	1.812
917	6.01	1.3313				876	0.8898	1.6773	4.12	1.609
918	5.99	1.2886				877	0.94	1.6726	4.12	1.706
919	5.98	1.2962				878	0.9162	1.7644	4.1	1.643
920	5.99	1.3228				879	0.9512	1.8049	4.04	1.777
921	5.98	1.3219				880	0.9319	1.8808	4.08	1.819
922	5.96	1.3873				881	0.9167	1.88	4.02	2.026
923	5.95	1.3438				882	0.9163	1.9004	3.98	1.835
924	5.95	1.3663				883	0.9691	1.8285	3.92	1.932
925	5.99	1.431				884	0.9217	1.8036	3.93	1.778
926	4.08	1.4236				885	0.966	1.786	3.96	0.0799
927	4.04	1.3527				886	0.9318	1.811	4	0.095
928	4.03	1.3496				887	0.9064	1.8699	4.03	0.0839
929	4.03	1.3351				888	0.8272	1.9009	4.04	0.0974
930	4	1.3023				889	0.8621	1.8847	4.09	0.0971
931	4.02	1.3386				890	0.8451	1.8945	4.13	0.0854
932	3.97	1.3897				891	0.8398	1.8591	4.1	0.1028
933	3.93	1.4489				892	0.8918	1.7266	4.1	0.0899
934	3.96	1.4539				893	0.8184	1.6008	4.16	0.1072
935	3.97	1.4729				894	0.8537	1.6696	4.21	0.0959
936	3.99	1.4702				895	0.825	1.6813	4.17	0.0943
937	4.02	1.4652				896	0.8376	1.7324	4.18	0.0925
938	4.06	1.4294				897	0.8502	1.7851	4.18	0.1057
939	4.09	1.4119				898	0.8691	1.7667	4.17	0.0811
940	4.11	1.391				899	0.8382	1.761	4.17	0.1005
941	4.14	1.3914				900	0.8622	1.8038	4.16	0.0986
942	4.16	1.4854				901	0.8697	1.7635	4.15	0.106
943	4.19	1.4438				902	0.8204	1.7303	4.12	0.1228
944	4.21	1.3628				903	0.8786	1.6971	6.09	0.1008
945	4.2	1.406				904	0.8724	1.6893	6.09	0.1012
946	4.21	1.3579				905	0.9504	1.6657	6.02	0.0987
947	4.2	1.3809				906	0.9561	1.6344	6.07	0.1116
948	4.16	1.4182				907	0.8753	1.6744	6.05	0.089
949	4.16	1.4443				908	0.9094	1.6837	6.04	0.0845
950	4.15	1.4861				909	0.952	1.64	6.07	0.0962
951	4.2	1.5043				910	0.9326	1.5763	6.02	0.1012
952	4.22	1.5196				911	0.9348	1.6376	5.99	0.0985
953	4.18	1.4936				912	0.8383	1.6473	6	0.0853
954	4.18	1.4525				913	0.9623	1.5863	6.04	0.1083
955	4.23	1.4531				914	0.935	1.6159	6.04	0.5178
956	4.28	1.4815				915	0.8886	1.6753	5.98	0.6237
957	4.3	1.4688				916	0.9324	1.6604	6.02	0.3948
958	4.28	1.4969				917	0.8695	1.6147	6.01	0.5915
959	4.29	1.4523				918	0.8721	1.566	5.99	0.6514
960	4.27	1.4211				919	0.9033	1.5418	5.98	0.7077
961	4.3	1.4944				920	0.8335	1.563	5.99	0.8573
962	4.26	1.4276				921	0.9268	1.5323	5.98	0.8312
963	4.28	1.4357				922	0.9682	1.5253	5.96	0.916
964	4.29	1.4171				923	0.9334	1.5373	5.95	0.7183
965	4.34	1.3777				924	0.9191	1.4849	5.95	0.9107
966	4.33	1.4421				925	0.9099	1.4839	5.99	0.7308
967	4.34	1.4509				926	0.8945	1.4698	4.08	0.7748
968	4.33	1.348				927	0.9427	1.443	4.04	0.8064
969	4.33	1.3461				928	0.9033	1.4491	4.03	0.7365
970	4.44	1.4135				929	0.948	1.4852	4.03	0.8033
971	4.5	1.329				930	1.0243	1.4749	4	0.7587
972	4.54	1.3597				931	1.0213	1.4824	4.02	0.6524
973	4.54	1.3092				932	1.0628	1.5585	3.97	0.8039
974	4.52	1.3699				933	1.0246	1.494	3.93	0.8087
975	4.49	1.3877				934	0.984	1.4556	3.96	0.9801
976	4.49	1.3933				935	0.9534	1.4299	3.97	0.7455
977	4.52	1.386				936	0.9072	1.442	3.99	0.5641
978	4.49	1.4114				937	0.9338	1.4486	4.02	0.6071
979	4.5	1.3662				938	0.9241	1.491	4.06	0.7231
980	4.45	1.3963				939	0.9339	1.4097	4.09	0.3867
981	4.41	1.3344				940	0.885	1.3797	4.11	0.5121
982	4.38	1.3996				941	0.8728	1.3847	4.14	0.504
983	4.36	1.369				942	0.8842	1.5113	4.16	0.6954
984	4.42	1.4152				943	0.9091	1.4383	4.19	0.6169
985	4.39	1.4717				944	0.8996	1.3587	4.21	0.8017
986	4.38	1.4495				945	0.9657	1.3607	4.2	0.6489
987	4.43	1.4109				946	0.967	1.4425	4.21	0.7826
988	4.48	1.4201				947	0.9322	1.4367	4.2	0.6783
989	4.5	1.3337				948	0.9543	1.477	4.16	0.7632
990	4.46	1.3231				949	0.9393	1.5794	4.16	0.6752
991	4.43	1.3429				950	1.077	1.5075	4.15	0.7823
992	4.48	1.4049				951	0.9949	1.4332	4.2	0.9407
993	4.43	1.3434				952	1.0022	1.4246	4.22	0.8697
994	4.34	1.3625				953	0.9033	1.4199	4.18	0.889
995	4.38	1.3529				954	0.9899	1.4521	4.18	0.935
996	4.38	1.3258				955	1.0395	1.4207	4.23	1.1286
997	4.36	1.3672				956	1.024	1.3961	4.28	0.857
998	4.39	1.2675				957	0.9842	1.4623	4.3	1.0702
999	4.39	1.2923				958	1.0083	1.4626	4.28	1.0014
1000	4.37	1.2753				959	1.0389	1.4231	4.29	0.7842
1001	4.35	1.2714				960	1.0481	1.3562	4.27	0.9148
1002	4.37	1.2594				961	1.0768	1.3997	4.3	0.6408
1003	4.35	1.2882				962	1.0701	1.5133	4.26	0.5925
1004	4.29	1.3011				963	0.9636	1.5112	4.28	0.8589
1005	4.31	1.3192				964	1.0146	1.5063	4.29	0.872
1006	4.31	1.3815				965	1.0495	1.5112	4.34	0.6624
1007	4.31	1.3312				966	1.0477	1.4694	4.33	0.7895
1008	4.31	1.3875				967	1.0137	1.4483	4.34	0.7513
1009	4.3	1.4254				968	1.0456	1.5126	4.33	0.8299
1010	4.34	1.466				969	1.0213	1.5347	4.33	0.9525
1011	4.32	1.3485				970	1.013	1.6023	4.44	0.8267
1012	4.33	1.3334				971	0.9292	1.608	4.5	0.8091
1013	4.35	1.2962				972	0.8724	1.5463	4.54	0.6694
1014	4.34	1.3742				973	0.8572	1.474	4.54	0.9285
1015	4.36	1.3632				974	0.8907	1.4933	4.52	0.8674
1016	4.35	1.3544				975	0.8732	1.4799	4.49	0.8236
1017	4.35	1.359				976	0.8674	1.4464	4.49	0.8636
1018	4.36	1.3652				977	0.8375	1.5548	4.52	0.8
1019	4.35	1.4428				978	0.7982	1.6271	4.49	0.8439
1020	4.32	1.4446				979	0.846	1.626	4.5	0.8518
1021	4.29	1.4306				980	0.9141	1.6726	4.45	0.9771
1022	4.27	1.4391				981	0.8267	1.5457	4.41	0.9911
1023	4.3	1.4529				982	0.831	1.556	4.38	0.8362
1024	4.33	1.3385				983	0.7938	1.516	4.36	0.962
1025	4.33	1.343				984	0.813	1.4628	4.42	0.8132
1026	4.35	1.3469				985	0.8918	1.4291	4.39	0.6558
1027	4.29	1.3255				986	0.8732	1.4746	4.38	0.9037
1028	4.31	1.3325				987	0.8365	1.4931	4.43	0.5826
1029	4.31	1.3219				988	0.8486	1.4061	4.48	0.7885
1030	4.31	1.3074				989	0.8623	1.4838	4.5	1.0082
1031	4.31	1.3742				990	0.8476	1.4734	4.46	0.8615
1032	4.31	1.3401				991	0.8366	1.5728	4.43	0.8267
1033	4.29	1.3665				992	0.8205	1.5229	4.48	0.8979
1034	4.26	1.3413				993	0.8273	1.4791	4.43	0.7641
1035	4.22	1.3623				994	0.8944	1.4872	4.34	0.7899
1036	4.23	1.3499				995	0.9156	1.5087	4.38	0.8121
1037	4.24	1.3797				996	0.8751	1.5066	4.38	0.6055
1038	4.28	1.3786				997	0.9035	1.6151	4.36	0.6544
1039	4.28	1.4077				998	0.8859	1.6804	4.39	0.6034
1040	4.27	1.4018				999	0.8658	1.6534	4.39	0.7469
1041	4.34	1.3758				1000	0.9064	1.6013	4.37	0.8202
1042	4.33	1.4842				1001	0.9147	1.633	4.35	0.8461
1043	4.35	1.5424				1002	0.8629	1.643	4.37	0.718
1044	4.35	1.5407				1003	0.9093	1.6588	4.35	0.755
1045	4.32	1.5352				1004	0.9314	1.6868	4.29	0.7939
1046	4.32	1.4788				1005	0.8841	1.7048	4.31	0.6692
1047	4.33	1.5438				1006	0.8663	1.6964	4.31	0.7062
1048	4.27	1.525				1007	0.8368	1.7643	4.31	0.4789
1049	4.28	1.4706				1008	0.89	1.7497	4.31	0.7109
1050	4.31	1.5148				1009	0.9063	1.7763	4.3	0.6697
1051	4.35	1.5077				1010	0.9206	1.781	4.34	0.5269
1052	4.38	1.5026				1011	0.8782	1.7789	4.32	0.6174
1053	4.35	1.4779				1012	0.9272	1.7941	4.33	0.6703
1054	4.34	1.4457				1013	0.9608	1.8048	4.35	0.4282
1055	4.38	1.438				1014	1.0921	1.8525	4.34	0.6144
1056	4.39	1.4152				1015	1.0742	1.8553	4.36	0.6667
1057	4.43	1.473				1016	1.0508	1.8997	4.35	0.6006
1058	4.39	1.5132				1017	1.0362	1.8445	4.35	0.5597
1059	4.4	1.4552				1018	0.9503	1.8384	4.36	0.632
1060	4.43	1.4452				1019	0.9713	1.7948	4.35	0.4515
1061	4.44	1.4967				1020	0.9229	1.812	4.32	0.5805
1062	4.37	1.4761				1021	0.9363	1.8251	4.29	0.5464
1063	4.33	1.4018				1022	1.0192	1.8341	4.27	0.5032
1064	4.29	1.5102				1023	1.0052	1.807	4.3	0.4459
1065	4.29	1.4245				1024	1.0256	1.8328	4.33	0.4159
1066	4.3	1.4017				1025	1.0398	1.8247	4.33	0.5982
1067	4.29	1.4954				1026	1.0562	1.8317	4.35	0.6066
1068	4.32	1.4				1027	1.0745	1.7914	4.29	0.4752
1069	4.27	1.3887				1028	0.9926	1.7209	4.31	0.3735
1070	4.25	1.4601				1029	0.942	1.6929	4.31	0.6584
1071	4.28	1.4039				1030	0.9819	1.6635	4.31	0.5124
1072	4.22	1.4446				1031	1.0211	1.6572	4.31	1.1948
1073	4.18	1.4034				1032	1.0059	1.6429	4.31	1.2057
1074	4.19	1.4054				1033	1.0242	1.5797	4.29	1.1884
1075	4.23	1.3998				1034	0.9902	1.5087	4.26	1.1658
1076	4.24	1.4371				1035	0.9978	1.4561	4.22	1.1244
1077	3.0752	1.4588				1036	0.9093	1.3966	4.23	1.1168
1078	3.0721	1.4243				1037	0.9355	1.4461	4.24	1.0866
1079	3.0888	1.4878				1038	0.9592	1.422	4.28	1.1377
1080	3.116	1.4748				1039	0.9487	1.3736	4.28	1.1516
1081	3.1488	1.3879				1040	0.9341	1.4393	4.27	1.1143
1082	3.1048	1.4151				1041	0.9632	1.4183	4.34	1.0383
1083	3.1251	1.3477				1042	0.9501	1.3897	4.33	1.0838
1084	3.1299	1.3473				1043	0.9584	1.3861	4.35	1.1295
1085	3.0721	1.3378				1044	0.9626	1.3736	4.35	1.1704
1086	3.0491	1.2626				1045	1.011	1.3292	4.32	1.1228
1087	3.0136	1.3145				1046	0.964	1.2684	4.32	1.0738
1088	3.0569	1.3055				1047	1.0001	1.2841	4.33	1.2724
1089	3.0491	1.3734				1048	0.9903	1.3131	4.27	1.0496
1090	3.0794	1.3515				1049	0.9329	1.3698	4.28	1.2087
1091	3.0662	1.4019				1050	1.0233	1.398	4.31	1.1502
1092	3.0487	1.4348				1051	1.0238	1.3953	4.35	1.1238
1093	3.0205	1.5181				1052	1.036	1.4694	4.38	1.1632
1094	3.0255	1.5284				1053	0.9804	1.4941	4.35	1.2788
1095	2.9937	1.4488				1054	1.0384	1.5063	4.34	1.2841
1096	3.0499	1.5095				1055	1.0244	1.4456	4.38	1.23
1097	3.03	1.5145				1056	1.0435	1.4197	4.39	0.9964
1098	3.0654	1.57				1057	1.0553	1.4262	4.43	1.1041
1099	3.0518	1.4802				1058	1.09	1.4576	4.39	0.9646
1100	3.0528	2.077				1059	1.062	1.5043	4.4	1.0093
1101	3.002	1.954				1060	1.1442	1.4163	4.43	1.0727
1102	2.9919	1.941				1061	1.1062	1.5134	4.44	1.0297
1103	3.0036	1.89				1062	1.0874	1.477	4.37	1.0169
1104	2.9986	1.823				1063	1.0626	1.4767	4.33	1.1823
1105	2.9496	1.714				1064	1.1276	1.4573	4.29	1.0772
1106	2.9498	1.766				1065	1.1844	1.4736	4.29	0.9372
1107	2.9974	1.666				1066	1.1527	1.4179	4.3	1.2131
1108	2.9961	1.732				1067	1.1217	1.3721	4.29	1.4224
1109	3.0031	1.745				1068	1.091	1.3722	4.32	1.0119
1110	3.02	1.649				1069	1.0486	1.4355	4.27	1.1008
1111	2.9929	1.652				1070	0.986	1.3821	4.25	1.0475
1112	3.0122	1.644				1071	1.0123	1.3947	4.28	1.0739
1113	3.0435	1.818				1072	1.0061	1.3255	4.22	1.0215
1114	3.0438	1.716				1073	0.9535	1.2691	4.18	1.0065
1115	3.0334	1.694				1074	0.9518	1.2463	4.19	0.8924
1116	2.9827	1.669				1075	0.9561	1.2724	4.23	0.9552
1117	2.9336	1.711				1076	0.9842	1.2551	4.24	1.0484
1118	2.9196	1.734				1077	1.032	1.2869	3.0752	1.0784
1119	2.9344	1.731				1078	1.029	1.2622	3.0721	1.1099
1120	2.9755	1.741				1079	0.9473	1.1893	3.0888	1.0892
1121	2.9543	1.752				1080	0.9084	1.2018	3.116	1.0442
1122	3.0135	1.706				1081	0.9657	1.2002	3.1488	1.0241
1123	3.0364	1.648				1082	0.9666	1.1817	3.1048	1.1256
1124	3.0298	1.695				1083	0.9858	1.2111	3.1251	1.0127
1125	3	1.703				1084	0.9423	1.2564	3.1299	1.0762
1126	3.0237	1.694				1085	0.9684	1.3165	3.0721	1.1231
1127	3.0399	1.705				1086	0.9884	1.2686	3.0491	1.1253
1128	3.0846	1.75				1087	1.0082	1.3037	3.0136	1.0359
1129	3.0928	1.789				1088	1.0213	1.3338	3.0569	1.1146
1130	3.093	1.788				1089	1.0371	1.2763	3.0491	1.0747
1131	3.0383	1.7				1090	0.9911	1.3287	3.0794	1.1265
1132	3.0621	1.699				1091	1.0472	1.3316	3.0662	1.1074
1133	3.0101	1.76				1092	1.0363	1.3414	3.0487	1.1468
1134	3.0004	1.719				1093	1.0602	1.3133	3.0205	1.1644
1135	2.9753	1.781				1094	1.0426	1.2987	3.0255	1.1463
1136	2.9699	1.809				1095	1.071	1.3239	2.9937	1.2469
1137	2.9546	1.723				1096	1.0309	1.391	3.0499	1.1817
1138	2.9546	1.728				1097	1.0156	1.3928	3.03	1.0935
1139	2.9296	1.703				1098	1.0387	1.4329	3.0654	0.9923
1140	2.9689	1.829				1099	0.9804	1.468	3.0518	1.0255
1141	2.9927	1.826				1100	0.9492	1.5029	3.0528	1.1299
1142	2.9919	1.751				1101	0	1.4768	3.002	1.0833
1143	2.9779	1.658				1102	0.0808	1.4884	2.9919	1.0914
1144	2.9644	1.829				1103	0.0807	1.488	3.0036	1.0631
1145	2.9278	1.746				1104	0.081	1.4211	2.9986	1.1001
1146	2.9001	1.806				1105	0.0841	1.4695	2.9496	1.2312
1147	2.8942	1.944				1106	0.0823	1.5385	2.9498	1.1074
1148	2.9197	1.871				1107	0.0837	1.4543	2.9974	1.0582
1149	2.8752	1.808				1108	0.0825	1.4551	2.9961	1.035
1150	2.8792	1.645				1109	0.0826	1.3747	3.0031	1.0694
1151	2.878	1.745				1110	0.0824	1.4335	3.02	1.0072
1152	2.8143	1.742				1111	0.8448	1.3968	2.9929	1.1757
1153	2.8314	1.712				1112	0.8023	1.3762	3.0122	1.0264
1154	2.8483	1.69				1113	0.7567	1.4344	3.0435	1.0853
1155	2.921	1.7				1114	0.8006	1.4755	3.0438	0.996
1156	2.945	1.723				1115	0.8023	1.4852	3.0334	1.1581
1157	2.956	1.727				1116	0.898	1.4939	2.9827	1.0927
1158	2.9215	1.708				1117	0.9637	1.523	2.9336	1.0991
1159	2.8782	1.77				1118	0.9428	1.4711	2.9196	1.1736
1160	2.8334	1.677				1119	0.9311	1.417	2.9344	1.0994
1161	2.8037	1.764				1120	0.9327	1.4803	2.9755	1.1561
1162	2.8414	1.673				1121	0.8844	1.5022	2.9543	1.0016
1163	2.8875	1.676				1122	0.8317	1.48	3.0135	0.9719
1164	2.8768	1.815				1123	0.8285	1.4104	3.0364	1.03
1165	2.8604	1.712				1124	0.7892	1.4415	3.0298	1.1295
1166	2.9002	1.748				1125	0.8934	1.4624	3	1.1402
1167	2.914	1.674				1126	0.9471	1.3982	3.0237	1.0858
1168	2.9035	1.759				1127	0.8653	1.4041	3.0399	1.0653
1169	2.9147	1.743				1128	0.9287	1.3926	3.0846	1.0413
1170	2.9132	1.708				1129	0.8423	1.3901	3.0928	1.1281
1171	2.9194	1.85				1130	0.8405	1.4128	3.093	1.1369
1172	2.94	1.754				1131	0.8144	1.3884	3.0383	0.9697
1173	3.0007	1.702				1132	0.7986	1.4152	3.0621	1.0298
1174	3.0221	1.734				1133	0.7874	1.4106	3.0101	0.9526
1175	2.9541	1.7				1134	0.7462	1.4602	3.0004	1.11
1176	2.9844	1.784				1135	0.7599	1.4479	2.9753	1.0424
1177	2.9486	1.885				1136	0.7956	1.3453	2.9699	1.0835
1178	2.9447	1.81				1137	0.7753	1.3464	2.9546	1.1395
1179	2.9694	1.755				1138	0.7566	1.3323	2.9546	1.1158
1180	2.9693	1.811				1139	0.6883	1.3906	2.9296	1.1432
1181	2.9794	1.783				1140	0.6933	1.3681	2.9689	1.0881
1182	2.9585	1.63				1141	0.7111	1.3388	2.9927	1.0602
1183	2.9846	1.76				1142	0.7602	1.356	2.9919	1.1068
1184	2.9913	1.712				1143	0.7689	1.3599	2.9779	1.0497
1185	2.9576	1.665				1144	0.7637	1.4387	2.9644	1.1277
1186	2.9749	1.636				1145	0.8021	1.5264	2.9278	1.1558
1187	2.9659	1.732				1146	0.7745	1.5832	2.9001	1.1361
1188	2.9846	1.755				1147	0.7719	1.5346	2.8942	1.1458
1189	3.0199	1.747				1148	0.7939	1.5402	2.9197	1.1245
1190	3.0448	1.778				1149	0.8069	1.4819	2.8752	1.0699
1191	2.9982	1.839				1150	0.8243	1.4087	2.8792	1.1334
1192	3.0549	1.73				1151	0.8716	1.3812	2.878	1.1778
1193	3.0306	1.731				1152	0.8756	1.3092	2.8143	1.0561
1194	3.0029	1.615				1153	0.8745	1.1816	2.8314	1.0876
1195	3.022	1.767				1154	0.9061	1.1628	2.8483	1.0536
1196	3.0745	1.717				1155	0.8832	1.1856	2.921	1.0528
1197	3.0819	1.78				1156	0.8852	1.1536	2.945	1.13
1198	3.0902	1.727				1157	0.8012	1.1618	2.956	1.1224
1199	3.061	1.804				1158	0.8785	1.2341	2.9215	1.0507
1200	3.0534	1.82				1159	0.8979	1.279	2.8782	2.2441
1201	3.0621	1.795				1160	0.929	1.3233	2.8334	2.1315
1202	3.0388	1.613				1161	0.8802	1.3405	2.8037	2.1477
1203	3.0969	1.703				1162	0.8941	1.3381	2.8414	2.1939
1204	3.0805	1.65				1163	0.8074	1.344	2.8875	2.2441
1205	3.05	1.824				1164	0.8578	1.2685	2.8768	2.2862
1206	3.0038	1.758				1165	0.8849	1.2711	2.8604	2.2686
1207	2.9974	1.753				1166	0.8569	1.2638	2.9002	2.1718
1208	3.0313	1.78				1167	0.8661	1.284	2.914	2.2045
1209	3.0432	1.765				1168	0.8742	1.3144	2.9035	2.1393
1210	3.0546	1.812				1169	0.8706	1.2886	2.9147	2.1934
1211	3.036	1.907				1170	0.8298	1.3512	2.9132	2.1875
1212	3.0639	1.732				1171	0.8773	1.409	2.9194	2.3013
1213	3.1203	1.732				1172	0.9379	1.3898	2.94	2.2722
1214	3.0849	1.748				1173	0.9047	1.4016	3.0007	2.2514
1215	3.0685	1.734				1174	0.8221	1.4546	3.0221	2.1879
1216	3.0247	1.808				1175	0.8795	1.5211	2.9541	2.1711
1217	3.055	1.813				1176	0.8845	1.5485	2.9844	2.1855
1218	3.0778	1.864				1177	0.8752	1.5867	2.9486	2.1023
1219	3.1074	1.791				1178	0.8976	1.5509	2.9447	2.0707
1220	3.1191	1.772				1179	0.8948	1.4726	2.9694	2.0447
1221	3.1144	1.859				1180	0.8837	1.5381	2.9693	2.0492
1222	3.1214	1.76				1181	0.8424	1.5784	2.9794	2.0285
1223	3.1144	1.807				1182	0.8837	1.5891	2.9585	2.0519
1224	3.1279	1.73				1183	0.8965	1.559	2.9846	2.0198
1225	3.1271	1.689				1184	0.8577	1.5697	2.9913	2.0096
1226	3.1237	1.779				1185	0.8791	1.6761	2.9576	2.0286
1227	3.1083	1.775				1186	0.9433	1.6668	2.9749	2.0211
1228	3.0932	1.717				1187	0.8933	1.7708	2.9659	1.9962
1229	3.0879	1.812				1188	0.8315	1.7519	2.9846	2.0528
1230	3.0796	1.87				1189	0.7684	1.8009	3.0199	2.0968
1231	3.0577	1.655				1190	0.7931	1.7324	3.0448	2.0013
1232	3.1084	1.875				1191	0.7925	1.5682	2.9982	2.0129
1233	3.1115	1.825				1192	0.8077	1.5731	3.0549	2.0461
1234	3.0976	1.793				1193	0.7769	1.5929	3.0306	2.0305
1235	3.0911	1.905				1194	0.7569	1.5978	3.0029	2.004
1236	3.1087	1.796				1195	0.8264	1.6356	3.022	2.021
1237	3.0978	1.652				1196	0.8426	1.6824	3.0745	1.9627
1238	3.1013	1.725				1197	0.8593	1.6712	3.0819	1.9959
1239	3.1497	1.693				1198	0.7567	1.6408	3.0902	1.9559
1240	3.1394	1.736				1199	0.851	1.6697	3.061	1.9627
1241	3.129	1.742				1200	0.924	1.7217	3.0534	1.9852
1242	3.1575	1.778				1201	0.8108	1.7199	3.0621	1.971
1243	3.1374	1.74				1202	0.7973	1.7289	3.0388	2.0992
1244	3.1284	1.884				1203	0.7614	1.6306	3.0969	2.1409
1245	3.0967	1.693				1204	0.7582	1.5819	3.0805	2.0709
1246	3.1183	1.774				1205	0.7618	1.5372	3.05	2.0455
1247	3.1131	1.821				1206	0.7777	1.5337	3.0038	1.9637
1248	3.1113	1.809				1207	0.7533	1.5755	2.9974	1.9116
1249	3.13	1.777				1208	0.7488	1.5472	3.0313	1.9683
1250	3.0906	1.682				1209	0.7455	1.5572	3.0432	2.0004
1251	3.0985	1.786				1210	0.7005	1.5411	3.0546	1.9767
1252	3.1264	1.632				1211	0.0819	1.5434	3.036	1.9495
1253	3.1492	1.683				1212	0.0841	1.5253	3.0639	1.9662
1254	3.1459	1.76				1213	0.0858	1.5491	3.1203	1.8906
1255	3.1939	1.775				1214	0.0851	1.604	3.0849	1.9554
1256	3.186	1.82				1215	0.0802	1.6565	3.0685	1.9547
1257	3.1922	1.875				1216	0.0817	1.5998	3.0247	1.9136
1258	3.1823	1.737				1217	0.0851	1.6605	3.055	1.8951
1259	3.1571	1.82				1218	0.0866	1.6558	3.0778	1.887
1260	3.1674	1.889				1219	0.0847	1.6437	3.1074	1.8321
1261	3.1896	1.748				1220	0.0859	1.6825	3.1191	1.8901
1262	3.1633	1.828				1221	0.0844	1.6961	3.1144	1.7946
1263	3.1237	2.01				1222	0.0849	1.7569	3.1214	1.7781
1264	3.1241	1.885				1223	0.0846	1.7523	3.1144	1.7286
1265	3.0912	1.851				1224	0.0819	1.6828	3.1279	1.7248
1266	3.0754	1.809				1225	0.0785	1.557	3.1271	1.7947
1267	3.0297	1.788				1226	0.0825	1.487	3.1237	1.8605
1268	3.002	1.805				1227	0.0833	1.4314	3.1083	1.8285
1269	2.9709	1.899				1228	0.4837	1.3926	3.0932	1.7751
1270	2.9755	1.837				1229	0.5577	1.46	3.0879	1.8148
1271	3.0251	1.894				1230	0.5729	1.5915	3.0796	1.8177
1272	3.0645	1.946				1231	0.6485	1.5894	3.0577	1.7625
1273	3.1066	1.935				1232	0.5859	1.5283	3.1084	1.696
1274	3.1209	1.786				1233	0.7038	1.5372	3.1115	1.7156
1275	3.1065	1.751				1234	0.681	1.4069	3.0976	1.7929
1276	3.182	1.797				1235	0.6942	1.4023	3.0911	1.7818
1277	3.1981	1.817				1236	0.7596	1.3796	3.1087	1.8167
1278	3.2181	1.817				1237	0.7435	1.3322	3.0978	1.7583
1279	3.2851	1.787				1238	0.7085	1.2965	3.1013	1.7486
1280	3.2766	1.809				1239	0.7029	1.2314	3.1497	1.7739
1281	3.2888	1.88				1240	0.7386	1.2484	3.1394	1.8042
1282	3.297	1.782				1241	0.7091	1.2283	3.129	1.7918
1283	3.3116	1.854				1242	0.7137	1.275	3.1575	1.7537
1284	3.2687	1.808				1243	0.6901	1.1891	3.1374	1.7448
1285	3.2732	1.736				1244	0.6617	1.093	3.1284	1.8063
1286	3.2709	1.87				1245	0.6684	1.0938	3.0967	1.8336
1287	3.2505	1.725				1246	0.6536	1.0676	3.1183	1.8516
1288	3.2772	1.708				1247	0.6947	1.0745	3.1131	1.8914
1289	3.2338	1.755				1248	0.7117	1.0784	3.1113	1.9877
1290	3.2362	1.756				1249	0.7108	1.0148	3.13	2.0408
1291	3.2273	1.757				1250	0.7723	0.9683	3.0906	2.0349
1292	3.278	1.724				1251	0.7533	0.9715	3.0985	2.0402
1293	3.2831	1.695				1252	0.6751	1.0017	3.1264	2.0223
1294	3.3266	1.696				1253	0.6819	0.9667	3.1492	1.9871
1295	3.3122	1.663				1254	0.7037	1.0287	3.1459	1.9862
1296	3.2625	1.642				1255	0.6861	1.0205	3.1939	1.8969
1297	3.2643	1.631				1256	0.6866	1.0412	3.186	1.8961
1298	3.2993	1.767				1257	0.7961	1.0306	3.1922	1.9014
1299	3.2872	1.783				1258	0.7482	1.0233	3.1823	1.8734
1300	3.3026	1.749				1259	0.8062	1.0054	3.1571	1.8354
1301	3.3264	1.747				1260	0.7563	1.0797	3.1674	1.8919
1302	3.3288	1.695				1261	0.7436	1	3.1896	1.9718
1303	3.3174	1.85				1262	0.7607	1.0128	3.1633	1.9714
1304	3.28	1.749				1263	0.7543	1.0652	3.1237	1.9388
1305	3.3237	1.783				1264	0.8277	1.0212	3.1241	1.9452
1306	3.3154	1.749				1265	0.7765	1.0134	3.0912	1.9188
1307	3.3317	1.722				1266	0.7445	1.0737	3.0754	1.9296
1308	3.3059	1.724				1267	0.7755	1.0734	3.0297	1.955
1309	3.3308	1.762				1268	0.71	1.0309	3.002	1.9048
1310	3.3124	1.738				1269	0.6359	1.0201	2.9709	1.933
1311	3.3213	1.901				1270	0.7158	1.0145	2.9755	1.9257
1312	3.3576	1.746				1271	0.7746	1.0008	3.0251	1.9643
1313	3.3548	1.757				1272	0.7592	0.9828	3.0645	2.0197
1314	3.31	1.719				1273	0.7047	0.9958	3.1066	2.0276
1315	3.37	1.739				1274	0.694	0.9828	3.1209	1.9787
1316	3.2964	1.774				1275	0.7867	1.036	3.1065	2.0284
1317	3.3206	1.803				1276	0.8661	1.0286	3.182	2.043
1318	3.2932	1.734				1277	0.8825	1.0472	3.1981	2.0213
1319	3.2896	1.742				1278	0.7887	1.0641	3.2181	1.9724
1320	3.2753	1.767				1279	0.8463	1.0118	3.2851	1.0543
1321	3.2593	1.738				1280	0.8898	1.0715	3.2766	1.0874
1322	3.283	1.685				1281	0.8965	1.0818	3.2888	1.0291
1323	3.2673	1.723				1282	0.9083	1.0582	3.297	1.1277
1324	3.2428	1.805				1283	0.9062	1.0194	3.3116	1.1157
1325	3.2632	1.693				1284	0.8508	1.0622	3.2687	1.0291
1326	3.267	1.713				1285	0.8591	1.0771	3.2732	1.0976
1327	3.2518	1.871				1286	0.8908	1.1007	3.2709	1.0659
1328	3.2394	1.789				1287	0.9372	1.0889	3.2505	1.1597
1329	3.2327	1.716				1288	0.8906	1.067	3.2772	1.1279
1330	3.226	1.772				1289	0.885	1.0454	3.2338	1.1052
1331	3.2652	1.718				1290	0.8817	1.0349	3.2362	1.085
1332	3.2622	1.648				1291	0.8639	1.0657	3.2273	1.1754
1333	3.286	1.779				1292	0.8662	1.0308	3.278	1.1251
1334	3.2941	1.688				1293	0.8272	1.0939	3.2831	1.0919
1335	3.2806	1.799				1294	0.8358	1.1177	3.3266	1.1599
1336	3.2485	1.791				1295	0.9019	1.1118	3.3122	1.1914
1337	3.2004	1.875				1296	0.8486	1.1038	3.2625	1.1226
1338	3.1876	1.721				1297	0.8342	1.0591	3.2643	1.1985
1339	3.2631	1.923				1298	0.9126	1.1092	3.2993	1.2168
1340	3.2895	1.951				1299	0.9297	1.0821	3.2872	1.1504
1341	3.2896	1.822				1300	0.9976	1.0595	3.3026	1.1739
1342	3.2844	1.844				1301	0.9452	1.0709	3.3264	1.1368
1343	3.2764	1.733				1302	0.9732	1.0352	3.3288	1.2241
1344	3.3007	1.754				1303	0.9274	0.9748	3.3174	1.2483
1345	3.3145	1.849				1304	0.9199	0.9841	3.28	1.1865
1346	3.3318	1.808				1305	0.8859	1.0078	3.3237	1.1707
1347	3.3718	1.851				1306	0.8493	1.04	3.3154	1.1788
1348	3.377	1.754				1307	0.8068	0.9855	3.3317	1.1064
1349	3.3245	1.815				1308	0.79	1.027	3.3059	1.1405
1350	3.3542	1.745				1309	0.7845	1.0372	3.3308	1.1339
1351	3.3569	1.923				1310	0.8848	1.1104	3.3124	1.0704
1352	3.3499	1.781				1311	0.8517	1.1736	3.3213	1.1252
1353	3.4023	1.865				1312	0.8797	1.055	3.3576	1.1531
1354	3.3957	1.848				1313	0.9201	1.0287	3.3548	1.1639
1355	3.4362	1.886				1314	0.8431	0.978	3.31	1.1719
1356	3.4067	1.815				1315	0.8627	1.0725	3.37	1.0756
1357	3.4014	1.829				1316	0.8913	0.994	3.2964	1.0354
1358	3.3865	1.884				1317	0.9443	0.9874	3.3206	1.0669
1359	3.3913	1.823				1318	0.986	1.0213	3.2932	1.0072
1360	3.3834	1.874				1319	0.9938	0.9898	3.2896	1.0201
1361	3.4285	1.774				1320	0.9202	1.047	3.2753	1.0708
1362	3.3515	1.827				1321	1.0395	0.9552	3.2593	1.0888
1363	3.3326	1.822				1322	1.0654	0.9776	3.283	1.0976
1364	3.3457	1.933				1323	1.0762	0.9441	3.2673	1.1774
1365	3.3221	1.835				1324	1.0034	0.9472	3.2428	1.1183
1366	3.3282	1.813				1325	0.9947	0.9515	3.2632	1.1677
1367	3.3162	1.868				1326	0.9825	0.9251	3.267	1.1733
1368	3.2887	1.839				1327	1.0646	0.9735	3.2518	1.0729
1369	3.348	1.821				1328	1.027	0.9888	3.2394	1.1105
1370	3.4058	1.835				1329	1.0409	0.9452	3.2327	1.0179
1371	3.3797	1.773				1330	1.0208	1.0177	3.226	1.0358
1372	3.3626	1.752				1331	0.9548	0.9764	3.2652	1.0167
1373	3.3673	1.831				1332	0.9906	0.9484	3.2622	1.0604
1374	3.3466	1.767				1333	1.0282	0.9809	3.286	1.0983
1375	3.2934	1.78				1334	1.0948	0.9847	3.2941	1.1312
1376	3.3384	1.775				1335	0.986	1.0182	3.2806	1.1493
1377	3.3484	1.827				1336	0.9937	0.9516	3.2485	1.1112
1378	3.3342	1.887				1337	1.0188	0.9388	3.2004	1.1102
1379	3.3547	1.819				1338	1.0583	0.9374	3.1876	1.1514
1380	3.3527	1.839				1339	1.0874	0.9501	3.2631	1.087
1381	3.3675	1.74				1340	1.0255	0.9107	3.2895	1.0317
1382	3.3999	1.858				1341	0.9619	0.9453	3.2896	1.1097
1383	3.36	1.87				1342	0.9961	0.9751	3.2844	1.0735
1384	3.3343	1.813				1343	1.0736	0.9124	3.2764	1.055
1385	3.3175	1.75				1344	0.9977	0.8535	3.3007	1.0057
1386	3.3684	1.703				1345	0.9823	0.8802	3.3145	0.9383
1387	3.3655	1.781				1346	0.9131	0.8946	3.3318	0.9412
1388	3.4053	1.854				1347	0.9428	0.8933	3.3718	0.9737
1389	3.4476	1.843				1348	1.0439	0.9418	3.377	1.0148
1390	3.3639	1.864				1349	1.0603	0.9247	3.3245	1.0326
1391	3.4003	1.825				1350	1.0408	0.9029	3.3542	1.0135
1392	3.4151	1.806				1351	1.0877	0.9425	3.3569	1.0145
1393	3.4206	1.794				1352	1.0747	0.9379	3.3499	0.9951
1394	3.4096	1.98				1353	1.0425	0.8901	3.4023	1.0711
1395	3.3786	1.953				1354	1.1058	0.899	3.3957	1.0479
1396	3.3808	1.747				1355	1.0921	0.9368	3.4362	1.1213
1397	3.3477	1.779				1356	1.0728	0.9173	3.4067	1.0402
1398	3.3832	1.883				1357	1.0557	0.9768	3.4014	1.0877
1399	3.4119	1.806				1358	1.0915	0.9635	3.3865	1.1266
1400	3.3487	1.882				1359	1.0633	0.9328	3.3913	1.0528
1401	3.4221	1.767				1360	1.0642	0.9717	3.3834	1.0298
1402	3.4578	1.74				1361	1.105	0.9685	3.4285	0.9954
1403	3.4589	1.718				1362	1.1265	0.9657	3.3515	0.9872
1404	3.4792	1.776				1363	1.1332	0.9619	3.3326	0.9536
1405	3.4058	1.744				1364	1.1843	0.9494	3.3457	0.9773
1406	3.4023	1.819				1365	1.2062	0.9134	3.3221	1.071
1407	3.4473	1.729				1366	1.2569	0.9402	3.3282	1.0798
1408	3.5125	1.669				1367	1.2265	0.9326	3.3162	1.0689
1409	3.5415	1.687				1368	1.1348	0.9238	3.2887	1.1172
1410	3.5348	1.707				1369	1.1528	0.9449	3.348	1.0781
1411	3.4883	1.772				1370	1.1614	1.0305	3.4058	1.037
1412	3.5322	1.782				1371	1.1103	1.0771	3.3797	1.0291
1413	3.5207	1.751				1372	1.0871	1.1279	3.3626	1.0525
1414	3.4616	1.799				1373	1.0945	1.0661	3.3673	1.0977
1415	3.4957	1.74				1374	1.0126	1.0505	3.3466	1.049
1416	3.5157	1.736				1375	1.0399	1.0407	3.2934	1.0734
1417	3.5077	1.732				1376	1.1403	1.0358	3.3384	1.1168
1418	3.4862	1.731				1377	1.0844	1.0462	3.3484	1.1186
1419	3.4905	1.778				1378	1.0373	1.0564	3.3342	1.0949
1420	3.4731	1.747				1379	1.112	1.072	3.3547	1.127
1421	3.4606	1.713				1380	1.1453	0.9648	3.3527	1.0742
1422	3.4511	1.709				1381	1.0853	1.0048	3.3675	1.0501
1423	3.4147	1.645				1382	1.1618	1.0825	3.3999	0.9858
1424	3.4384	1.657				1383	1.1791	1.1155	3.36	1.0331
1425	3.4179	1.748				1384	1.2088	1.0976	3.3343	1.0601
1426	3.4153	1.796				1385	1.1259	1.0832	3.3175	1.0324
1427	3.41	1.745				1386	1.1165	1.0902	3.3684	1.0798
1428	3.3963	1.645				1387	1.066	1.1723	3.3655	1.1474
1429	3.3977	1.695				1388	1.0822	1.1591	3.4053	1.1334
1430	3.4371	1.776				1389	1.1227	1.1221	3.4476	1.1335
1431	3.4706	1.767				1390	1.2269	1.1342	3.3639	1.2304
1432	3.4364	1.747				1391	1.1706	1.1151	3.4003	1.2816
1433	3.4052	1.718				1392	1.0569	1.1364	3.4151	1.2823
1434	3.4228	1.81				1393	1.0348	1.1664	3.4206	1.2402
1435	3.4696	1.696				1394	1.0535	1.1356	3.4096	1.2087
1436	3.5104	1.698				1395	1.0603	1.1326	3.3786	1.186
1437	3.5091	1.648				1396	1.0987	1.1806	3.3808	1.2315
1438	3.5229	1.681				1397	1.0126	1.1142	3.3477	1.1177
1439	3.5433	1.778				1398	0.9964	1.129	3.3832	1.1317
1440	3.5724	1.738				1399	0.9841	1.1958	3.4119	1.1529
1441	3.5943	1.731				1400	1.0418	1.2201	3.3487	1.1629
1442	3.5882	1.772				1401	1.0485	1.2121	3.4221	1.2459
1443	3.5417	1.732				1402	0.9603	1.1856	3.4578	1.1634
1444	3.5355	1.703				1403	0.9757	1.184	3.4589	1.1666
1445	3.5667	1.804				1404	1.0248	1.1843	3.4792	1.201
1446	3.5792	1.72				1405	1.07	1.2482	3.4058	1.2287
1447	3.548	1.699				1406	0.9802	1.2619	3.4023	1.1537
1448	3.5502	1.772				1407	0.9563	1.2426	3.4473	1.2248
1449	3.531	1.752				1408	0.9756	1.1379	3.5125	1.1632
1450	3.5163	1.767				1409	0.9106	1.1577	3.5415	1.1606
1451	3.5583	1.856				1410	0.9012	1.1525	3.5348	1.2003
1452	3.5748	1.831				1411	1.0028	1.1726	3.4883	1.1718
1453	3.5671	1.89				1412	0.9046	1.2383	3.5322	1.1417
1454	3.5523	1.871				1413	0.919	1.1858	3.5207	1.1652
1455	3.5576	1.719				1414	0.9663	1.209	3.4616	1.1206
1456	3.6295	1.853				1415	0.9523	1.1931	3.4957	1.1331
1457	3.6069	1.817				1416	1.0171	1.1267	3.5157	1.151
1458	3.5702	1.827				1417	1.0277	1.0424	3.5077	1.1869
1459	3.5393	1.687				1418	1.0535	1.0849	3.4862	1.1429
1460	3.5044	1.805				1419	1.1085	1.1752	3.4905	1.106
1461	3.4767	1.733				1420	1.0641	1.1623	3.4731	1.0831
1462	3.4644	1.662				1421	0.9385	1.1776	3.4606	1.071
1463	3.4493	1.664				1422	0.8904	1.133	3.4511	1.1628
1464	3.4024	1.742				1423	0.8857	1.1317	3.4147	1.1674
1465	3.4072	1.813				1424	0.8281	1.0828	3.4384	1.1767
1466	3.4267	1.746				1425	0.825	1.0315	3.4179	1.1783
1467	3.4054	1.751				1426	0.8691	1.0443	3.4153	1.1577
1468	3.4417	1.732				1427	0.8238	1.0825	3.41	1.1118
1469	3.4443	1.722				1428	0.8355	1.0584	3.3963	1.1239
1470	3.3931	1.676				1429	0.8534	1.0817	3.3977	1.1897
1471	3.4106	1.664				1430	0.8529	1.0841	3.4371	1.2343
1472	3.4575	1.826				1431	0.9075	1.0579	3.4706	1.165
1473	3.4405	1.806				1432	0.9511	1.1152	3.4364	1.1253
1474	3.4497	1.708				1433	0.9735	1.1386	3.4052	1.1934
1475	3.4772	1.835				1434	0.9158	1.1137	3.4228	1.1979
1476	3.4889	1.853				1435	0.9138	1.1233	3.4696	1.0864
1477	3.5075	1.767				1436	0.9442	1.1048	3.5104	1.0445
1478	3.491	1.827				1437	0.9315	1.1276	3.5091	1.1747
1479	3.5014	1.778				1438	0.9348	1.2124	3.5229	1.2009
1480	3.4995	1.79				1439	0.9698	1.1024	3.5433	1.207
1481	3.5318	1.814				1440	0.8973	1.1402	3.5724	1.1906
1482	3.5283	1.818				1441	0.8363	1.1281	3.5943	1.2219
1483	3.5306	1.817				1442	0.9025	1.1854	3.5882	1.1789
1484	3.5265	1.808				1443	0.8665	1.1759	3.5417	1.2275
1485	3.5065	1.78				1444	0.8463	1.1901	3.5355	1.2586
1486	3.4597	1.807				1445	0.8093	1.1639	3.5667	1.2388
1487	3.4812	1.721				1446	0.863	1.167	3.5792	1.2349
1488	3.4988	1.785				1447	0.8335	1.1951	3.548	1.2401
1489	3.5501	1.759				1448	0.7778	1.2365	3.5502	1.313
1490	3.5763	1.753				1449	0.7796	1.2283	3.531	1.3266
1491	3.5664	1.813				1450	0.7983	1.2108	3.5163	1.3004
1492	3.5584	1.694				1451	0.7998	1.2637	3.5583	1.3078
1493	3.5431	1.752				1452	0.8145	1.2173	3.5748	1.2851
1494	3.5823	1.829				1453	0.8013	1.1224	3.5671	1.3125
1495	3.5407	1.731				1454	0.8146	1.1438	3.5523	1.1841
1496	3.5694	1.671				1455	0.8409	1.1801	3.5576	1.2535
1497	3.5861	1.812				1456	0.8648	1.22	3.6295	1.2296
1498	3.6408	1.742				1457	0.875	1.1757	3.6069	1.2105
1499	3.6677	1.783				1458	0.9246	1.2431	3.5702	1.263
1500	3.6755	1.747				1459	0.861	1.2666	3.5393	1.3518
1501	3.6829	1.845				1460	0.8603	1.2891	3.5044	1.4105
1502	3.6714	1.792				1461	0.8018	1.3383	3.4767	1.4433
1503	3.635	1.857				1462	0.8409	1.3378	3.4644	1.3689
1504	3.5792	1.815				1463	0.8871	1.2794	3.4493	1.3757
1505	3.5819	1.904				1464	0.8509	1.2903	3.4024	1.3638
1506	3.5979	1.687				1465	0.7913	1.2588	3.4072	1.3691
1507	3.5951	1.726				1466	0.8194	1.2844	3.4267	1.3704
1508	3.6251	1.883				1467	0.8439	1.2045	3.4054	1.4061
1509	3.6474	1.698				1468	0.8713	1.1927	3.4417	1.3109
1510	3.6123	1.933				1469	0.9019	1.2252	3.4443	1.3556
1511	3.6384	1.681				1470	0.8584	1.2671	3.3931	1.3902
1512	3.6363	1.934				1471	0.8311	1.2738	3.4106	1.3841
1513	3.6147	1.821				1472	0.8176	1.3156	3.4575	1.38
1514	3.6029	1.882				1473	0.8383	1.3246	3.4405	1.3134
1515	3.6037	1.677				1474	0.8379	1.2593	3.4497	1.3277
1516	3.5583	1.845				1475	0.7818	1.2093	3.4772	1.3818
1517	3.5757	1.76				1476	0.798	1.1977	3.4889	1.2909
1518	3.5893	1.937				1477	0.8216	1.1454	3.5075	1.2416
1519	3.6268	1.712				1478	0.8009	1.1643	3.491	1.2376
1520	3.6232	1.784				1479	0.8837	1.13	3.5014	1.2564
1521	3.6157	1.937				1480	0.7914	1.1535	3.4995	1.171
1522	3.616	1.811				1481	0.8881	1.0987	3.5318	1.1775
1523	3.6317	1.86				1482	0.8849	1.1356	3.5283	1.1761
1524	3.6701	1.901				1483	0.864	1.1577	3.5306	1.25
1525	3.6011	1.956				1484	0.851	1.1798	3.5265	1.223
1526	3.6255	1.968				1485	0.795	1.0807	3.5065	1.245
1527	3.6409	1.963				1486	0.8948	1.1763	3.4597	1.295
1528	3.6522	1.869				1487	0.9188	1.1625	3.4812	1.3393
1529	3.6439	1.877				1488	0.8795	1.0534	3.4988	1.3658
1530	3.6315	1.874				1489	0.9814	1.0528	3.5501	1.3641
1531	3.581	1.992				1490	1.031	0.9494	3.5763	1.4185
1532	3.6286	1.924				1491	1.0253	0.9925	3.5664	1.3329
1533	3.668	1.792				1492	1.0234	1.0419	3.5584	1.2614
1534	3.7001	1.827				1493	1.0563	1.0108	3.5431	1.2258
1535	3.6845	1.906				1494	1.1095	0.9831	3.5823	1.23
1536	3.6794	1.854				1495	1.0634	1.0064	3.5407	1.2178
1537	3.6783	1.743				1496	1.0612	1.0265	3.5694	1.1811
1538	3.7176	1.787				1497	1.0912	1.0358	3.5861	1.1847
1539	3.6924	1.832				1498	1.0886	1.0675	3.6408	1.19
1540	3.6732	1.772				1499	1.0089	1.0468	3.6677	1.1823
1541	3.6554	1.77				1500	0.9825	1.0518	3.6755	1.1989
1542	3.6705	1.857				1501	1.0008	1.1116	3.6829	1.2081
1543	3.6549	1.837				1502	0.9741	1.1039	3.6714	1.2909
1544	3.6217	1.664				1503	0.9469	1.133	3.635	1.2272
1545	3.6357	1.648				1504	1.0475	1.0852	3.5792	1.2862
1546	3.6472	1.678				1505	1.0419	1.1493	3.5819	1.3482
1547	3.6946	1.765				1506	1.0185	1.0918	3.5979	1.3216
1548	3.6881	1.767				1507	1.1003	1.1081	3.5951	1.2991
1549	3.6837	1.762				1508	1.1628	1.0647	3.6251	1.2645
1550	3.7056	1.841				1509	1.1204	0.9907	3.6474	1.3294
1551	3.7133	1.751				1510	1.0371	1.0327	3.6123	1.3103
1552	3.7323	1.733				1511	1.03	1.0705	3.6384	1.2993
1553	3.7055	1.796				1512	1.1154	1.0522	3.6363	1.2379
1554	3.7182	1.788				1513	0.9771	1.0766	3.6147	1.2868
1555	3.7324	1.767				1514	0.9335	1.0905	3.6029	1.2731
1556	3.6708	1.76				1515	0.9772	1.0118	3.6037	1.2644
1557	3.6891	1.67				1516	0.952	1.0386	3.5583	1.2534
1558	3.698	1.642				1517	0.9293	1.0885	3.5757	1.2539
1559	3.6678	1.649				1518	0.9073	1.1091	3.5893	1.3515
1560	3.6857	1.778				1519	0.9144	1.0965	3.6268	1.4081
1561	3.6595	1.739				1520	0.8312	1.0572	3.6232	1.343
1562	3.6871	1.844				1521	0.8628	1.0073	3.6157	1.3031
1563	3.6963	1.749				1522	0.86	0.9776	3.616	1.2254
1564	3.6982	1.72				1523	0.8216	0.9758	3.6317	1.2781
1565	3.6252	1.775				1524	0.8315	1.0396	3.6701	1.3045
1566	3.6255	1.801				1525	0.8045	1.045	3.6011	1.2332
1567	3.6481	1.83				1526	0.8641	1.0136	3.6255	1.2207
1568	3.6963	1.801				1527	0.8469	1.0255	3.6409	1.2375
1569	3.6829	1.714				1528	0.8431	1.0611	3.6522	1.2019
1570	3.6706	1.753				1529	0.8482	1.0821	3.6439	1.2019
1571	3.6618	1.776				1530	0.8534	1.0904	3.6315	1.1723
1572	3.6879	1.628				1531	0.8191	1.1129	3.581	1.2376
1573	3.7215	1.721				1532	0.8412	1.1512	3.6286	1.1732
1574	3.7526	1.808				1533	0.7997	1.1069	3.668	1.1525
1575	3.7356	1.849				1534	0.8181	1.0882	3.7001	1.1492
1576	3.715	1.869				1535	0.8263	1.071	3.6845	1.1726
1577	3.6924	1.744				1536	0.759	1.1551	3.6794	1.1961
1578	3.7141	1.803				1537	0.7424	1.1283	3.6783	1.1801
1579	3.701	1.778				1538	0.7695	1.1013	3.7176	1.218
1580	3.6768	1.802				1539	0.7771	1.1188	3.6924	1.185
1581	3.7327	1.797				1540	0.8464	1.0907	3.6732	1.1631
1582	3.6878	1.741				1541	0.8969	1.072	3.6554	1.1924
1583	3.6702	1.877				1542	0.799	1.0515	3.6705	1.1845
1584	3.6482	1.864				1543	0.7571	1.0414	3.6549	1.1344
1585	3.6294	1.754				1544	0.7905	1.0831	3.6217	1.1379
1586	3.6189	1.729				1545	0.8148	1.0648	3.6357	1.1588
1587	3.5974	1.786				1546	0.8007	1.0751	3.6472	1.2102
1588	3.5723	1.893				1547	0.7853	1.0478	3.6946	1.2513
1589	3.5929	1.756				1548	0.8535	1.0279	3.6881	1.2395
1590	3.5605	1.737				1549	0.8588	1.1317	3.6837	1.2911
1591	3.5842	1.841				1550	0.851	1.1095	3.7056	1.2479
1592	3.6164	1.847				1551	0.9061	1.0783	3.7133	1.3171
1593	3.6295	1.76				1552	0.9214	1.0054	3.7323	1.3387
1594	3.6262	1.815				1553	0.9502	1.0574	3.7055	1.2955
1595	3.5987	1.766				1554	0.9276	1.093	3.7182	1.3198
1596	3.6013	1.833				1555	1.0414	1.0317	3.7324	1.3074
1597	3.5716	1.897				1556	1.0196	1.0158	3.6708	1.3721
1598	3.551	1.768				1557	1.0235	1.0463	3.6891	1.3606
1599	3.5112	1.788				1558	1.023	1.0667	3.698	1.3588
1600	3.5424	1.846				1559	0.894	1.1285	3.6678	1.41
1601	3.523	1.693				1560	0.9291	1.114	3.6857	1.3775
1602	3.4867	1.732				1561	0.8713	1.1278	3.6595	1.3325
1603	3.5273	1.852				1562	0.8585	1.1598	3.6871	1.3505
1604	3.5434	1.804				1563	0.9736	1.1289	3.6963	1.252
1605	3.5883	1.83				1564	1.0146	1.1808	3.6982	1.2558
1606	3.628	1.711				1565	0.9495	1.1624	3.6252	1.2807
1607	3.6193	1.77				1566	0.9039	1.1029	3.6255	1.3105
1608	3.5935	1.68				1567	0.943	1.0894	3.6481	1.2238
1609	3.5892	1.709				1568	1.0086	1.1389	3.6963	1.2528
1610	3.6178	1.723				1569	0.9885	1.1887	3.6829	1.1854
1611	3.5846	1.788				1570	0.9948	1.2227	3.6706	1.2657
1612	3.5594	1.755				1571	0.9952	1.2339	3.6618	1.3068
1613	3.5652	1.746				1572	0.9636	1.329	3.6879	1.2809
1614	3.5633	1.874				1573	0.9576	1.3138	3.7215	1.2449
1615	3.6051	1.746				1574	0.9901	1.3434	3.7526	1.3189
1616	3.5745	1.752				1575	0.9554	1.298	3.7356	1.3162
1617	3.5206	1.782				1576	1.0646	1.2821	3.715	1.2913
1618	3.5251	1.88				1577	0.976	1.2724	3.6924	1.2772
1619	3.5877	1.923				1578	0.9927	1.2551	3.7141	1.2175
1620	3.589	1.781				1579	1.0308	1.2136	3.701	1.2348
1621	3.5955	1.714				1580	1.0425	1.2469	3.6768	1.3305
1622	3.6076	1.787				1581	1.0075	1.2683	3.7327	1.2607
1623	3.5463	1.878				1582	0.9986	0.0801	3.6878	1.2649
1624	3.4801	1.818				1583	0.9172	0.0817	3.6702	1.2436
1625	3.5266	1.872				1584	0.9425	0.0802	3.6482	1.2646
1626	3.5759	1.865				1585	0.9436	0.0848	3.6294	1.2955
1627	3.5822	1.864				1586	0.9772	0.0823	3.6189	1.2427
1628	3.6117	1.864				1587	1.0838	0.0813	3.5974	1.274
1629	3.5856	1.783				1588	1.0344	0.083	3.5723	1.2035
1630	3.6068	1.76				1589	0.9503	0.0848	3.5929	1.188
1631	3.6157	1.71				1590	0.9702	0.0849	3.5605	1.1888
1632	3.5888	1.778				1591	0.9317	0.0836	3.5842	1.1008
1633	3.6178	1.813				1592	0.894	0.0832	3.6164	1.1036
1634	3.6124	1.784				1593	0.8658	0.084	3.6295	1.0838
1635	3.6314	1.902				1594	0.9517	0.082	3.6262	1.0629
1636	3.6357	1.866				1595	0.9707	0.0847	3.5987	1.0866
1637	3.6094	1.857				1596	0.9542	0.0821	3.6013	1.1785
1638	3.6221	1.813				1597	0.9807	0.0799	3.5716	1.1915
1639	3.632	1.764				1598	0.8843	0.0827	3.551	1.1339
1640	3.5953	1.75				1599	0.8504	0.0881	3.5112	1.2104
1641	3.5622	1.771				1600	0.892	0.0834	3.5424	1.2366
1642	3.5836	1.858				1601	0.8677	0.0832	3.523	1.203
1643	3.5764	1.742				1602	0.8595	0.0841	3.4867	1.163
1644	3.5794	1.927				1603	0.7838	0.0845	3.5273	1.1954
1645	3.5622	1.799				1604	0.8228	0.0848	3.5434	1.1468
1646	3.5594	1.754				1605	0.7926	0.0818	3.5883	1.1831
1647	3.6139	1.754				1606	0.8707	0.085	3.628	1.2135
1648	3.6469	1.905				1607	0.8741	0.085	3.6193	1.1895
1649	3.6515	1.855				1608	0.9133	0.0833	3.5935	1.2447
1650	3.6232	1.784				1609	0.919	0.0852	3.5892	1.2772
1651	3.6376	1.819				1610	0.9466	0.084	3.6178	1.2594
1652	3.6321	1.677				1611	0.9667	0.479	3.5846	1.2662
1653	3.6666	1.744				1612	0.996	0.5601	3.5594	1.1967
1654	3.6965	1.785				1613	0.983	0.6165	3.5652	1.2113
1655	3.6745	1.926				1614	0.963	0.636	3.5633	1.1358
1656	3.6932	1.787				1615	0.9285	0.6661	3.6051	1.2153
1657	3.6559	1.649				1616	0.9891	0.7397	3.5745	1.2584
1658	3.6524	1.73				1617	1.027	0.7275	3.5206	1.2044
1659	3.6273	1.684				1618	0.9694	0.7559	3.5251	1.264
1660	3.6258	1.646				1619	0.9535	0.7777	3.5877	1.3349
1661	3.6014	1.775				1620	0.9317	0.7262	3.589	1.2608
1662	3.5701	1.719				1621	0.9242	0.7118	3.5955	1.2443
1663	3.6154	1.771				1622	0.8771	0.7116	3.6076	1.2399
1664	3.6178	1.676				1623	0.8964	0.7924	3.5463	1.2171
1665	3.5813	1.732				1624	0.8663	0.8096	3.4801	1.2722
1666	3.5457	1.787				1625	0.9098	0.8024	3.5266	1.3522
1667	3.553	1.7				1626	0.9995	0.7956	3.5759	1.2214
1668	3.5971	1.729				1627	1.0162	0.8666	3.5822	1.2688
1669	3.5934	1.768				1628	1.0157	0.8038	3.6117	1.2284
1670	3.5799	1.624				1629	0.9985	0.8495	3.5856	1.2318
1671	3.6155	1.822				1630	1.0089	0.7523	3.6068	1.2488
1672	3.5804	1.749				1631	1.0548	0.7541	3.6157	1.1989
1673	3.6096	1.741				1632	0.9918	0.7578	3.5888	1.1473
1674	3.566	1.858				1633	0.9764	0.7537	3.6178	1.1645
1675	3.5747	1.787				1634	0.9874	0.74	3.6124	1.1675
1676	3.5834	1.813				1635	1.024	0.7599	3.6314	1.2012
1677	3.5511	1.77				1636	0.9881	0.8195	3.6357	1.1829
1678	3.5621	1.84				1637	0.9042	0.8361	3.6094	1.1673
1679	3.5463	1.792				1638	0.8995	0.7843	3.6221	1.1821
1680	3.562	1.877				1639	0.8639	0.8426	3.632	1.1581
1681	3.5799	1.853				1640	0.8726	0.7738	3.5953	1.1345
1682	3.6062	1.801				1641	0.8882	0.8719	3.5622	1.1442
1683	3.6432	1.777				1642	0.9009	0.8678	3.5836	1.1441
1684	3.6318	1.742				1643	0.84	0.8895	3.5764	1.1353
1685	3.6425	1.772				1644	0.8818	0.8967	3.5794	1.1597
1686	3.7433	1.803				1645	0.887	0.9097	3.5622	1.1727
1687	3.7458	1.772				1646	0.9166	0.9618	3.5594	1.2147
1688	3.774	1.883				1647	0.8992	0.9671	3.6139	1.1663
1689	3.7694	1.779				1648	0.8594	0.963	3.6469	1.0394
1690	3.7414	1.737				1649	0.918	0.9775	3.6515	1.0556
1691	3.7186	1.917				1650	0.9257	0.9604	3.6232	1.0719
1692	3.7638	1.85				1651	0.9216	0.9661	3.6376	1.0318
1693	3.6976	1.751				1652	0.8288	0.9165	3.6321	1.1082
1694	3.6912	1.704				1653	0.8435	0.9038	3.6666	1.1455
1695	3.6292	1.684				1654	0.8956	0.9356	3.6965	1.1077
1696	3.5993	1.941				1655	0.897	0.9289	3.6745	1.1036
1697	3.5676	1.736				1656	0.9335	0.8864	3.6932	1.0291
1698	3.571	1.758				1657	0.974	0.859	3.6559	1.0591
1699	3.571	1.899				1658	1.0361	0.8568	3.6524	1.1088
1700	3.5474	1.822				1659	0.9639	0.8943	3.6273	1.0242
1701	3.516	1.682				1660	0.8742	0.867	3.6258	1.0442
1702	3.5295	1.758				1661	0.9802	0.9083	3.6014	1.1328
1703	3.5532	1.696				1662	0.9563	0.9371	3.5701	1.1021
1704	3.592	1.626				1663	0.9756	0.943	3.6154	1.1034
1705	3.585	1.724				1664	0.9106	0.9954	3.6178	1.1519
1706	3.5454	1.796				1665	0.9012	0.9557	3.5813	1.1394
1707	3.5982	1.844				1666	1.0028	0.9578	3.5457	1.2181
1708	3.6247	1.786				1667	0.9046	1.0353	3.553	1.2193
1709	3.6434	1.684				1668	0.919	1.0315	3.5971	1.242
1710	3.6251	1.662				1669	0.9663	1.0842	3.5934	1.1607
1711	3.5925	1.778				1670	0.9523	1.1055	3.5799	1.1165
1712	3.5833	1.715				1671	1.0171	1.0993	3.6155	1.1209
1713	3.5952	1.666				1672	1.0277	1.0948	3.5804	1.1721
1714	3.6073	1.712				1673	1.0535	1.1303	3.6096	1.1149
1715	3.6189	1.753				1674	1.1085	1.0625	3.566	1.1146
1716	3.6177	1.77				1675	1.0641	1.0642	3.5747	1.1047
1717	3.5976	1.73				1676	0.9385	0.9932	3.5834	1.1218
1718	3.582	1.587				1677	0.8904	1.0137	3.5511	1.1368
1719	3.5193	1.781				1678	0.8857	1.0147	3.5621	1.171
1720	3.527	1.702				1679	0.8281	1.0495	3.5463	1.1069
1721	3.5461	1.68				1680	0.825	1.0715	3.562	1.2367
1722	3.5413	1.723				1681	0.8691	1.0731	3.5799	1.1821
1723	3.5478	1.712				1682	0.8238	1.0997	3.6062	1.1792
1724	3.556	1.8				1683	0.8355	1.0049	3.6432	1.2055
1725	3.5849	1.724				1684	0.8534	0.9793	3.6318	1.2161
1726	3.5641	1.694				1685	0.8529	1.0228	3.6425	1.3091
1727	3.5705	1.604				1686	0.9075	1.0711	3.7433	1.2418
1728	3.5121	1.687				1687	0.9511	1.0341	3.7458	1.2663
1729	3.4936	1.766				1688	0.9735	1.0495	3.774	1.1759
1730	3.5289	1.725				1689	0.9158	1.1004	3.7694	1.1579
1731	3.5264	1.765				1690	0.9138	1.1771	3.7414	1.1415
1732	3.4922	1.74				1691	0.9442	1.1218	3.7186	1.1887
1733	3.463	1.698				1692	0.9315	1.0718	3.7638	1.2741
1734	3.4663	1.729				1693	0.9348	1.0877	3.6976	1.2016
1735	3.4659	1.697				1694	0.9698	1.1441	3.6912	1.2266
1736	3.4583	1.762				1695	0.8973	1.066	3.6292	1.1926
1737	3.4691	1.775				1696	0.8363	1.0509	3.5993	1.247
1738	3.5077	1.698				1697	0.9025	0.9855	3.5676	1.2312
1739	3.4764	1.754				1698	0.8665	0.9765	3.571	1.2478
1740	3.4619	1.743				1699	0.8463	0.9678	3.571	1.2592
1741	3.5078	1.724				1700	0.8093	0.9894	3.5474	1.2676
1742	3.4569	1.702				1701	0.863	1.009	3.516	1.3441
1743	3.494	1.71				1702	0.8335	1.0481	3.5295	1.3959
1744	3.5517	1.823				1703	0.7778	1.0459	3.5532	1.2653
1745	3.5681	1.769				1704	0.7796	1.0145	3.592	1.2484
1746	3.6028	1.757				1705	0.7983	1.0407	3.585	1.1213
1747	3.5808	1.734				1706	0.7998	1.0783	3.5454	1.2343
1748	3.5455	1.753				1707	0.8145	1.144	3.5982	1.2602
1749	3.5765	1.783				1708	0.947	1.1674	3.6247	1.2414
1750	3.6042	1.707				1709	0.8827	1.1947	3.6434	1.2458
1751	3.5743	1.687				1710	0.9104	1.1878	3.6251	1.2365
1752	3.5361	1.671				1711	0.8411	1.0673	3.5925	1.2146
1753	3.4854	1.651				1712	0.799	1.1287	3.5833	1.1536
1754	3.4923	1.67				1713	0.8106	1.1305	3.5952	1.133
1755	3.5285	1.703				1714	0.8504	1.138	3.6073	1.045
1756	3.5434	1.712				1715	0.9068	1.1185	3.6189	1.035
1757	3.5014	1.733				1716	0.8311	1.0734	3.6177	1.0159
1758	3.5028	1.67				1717	0.8557	1.098	3.5976	1.0429
1759	3.5435	1.682				1718	0.8345	1.0623	3.582	1.035
1760	3.5589	1.747				1719	0.8127	1.1023	3.5193	1.0255
1761	3.599	1.662				1720	0.7323	1.0589	3.527	1.0808
1762	3.6202	1.77				1721	0.7208	1.0951	3.5461	1.0613
1763	3.6056	1.771				1722	0.7489	1.0864	3.5413	1.0368
1764	3.5772	1.638				1723	0.8212	1.0844	3.5478	1.0045
1765	3.5643	1.746				1724	0.8012	1.0417	3.556	1.0707
1766	3.5444	1.697				1725	0.8193	0.9775	3.5849	1.0746
1767	3.5483	1.626				1726	0.8566	1.0493	3.5641	1.1488
1768	3.5824	1.738				1727	0.8167	1.1267	3.5705	1.1909
1769	3.6129	1.709				1728	0.7497	1.0324	3.5121	1.2727
1770	3.6728	1.822				1729	0.7724	1.0196	3.4936	1.2677
1771	3.6824	1.578				1730	0.8368	1.0507	3.5289	1.2957
1772	3.7254	1.695				1731	0.7784	1.0308	3.5264	1.2601
1773	3.7412	1.719				1732	0.7635	1.0809	3.4922	1.2124
1774	3.7177	1.636				1733	0.8015	1.0855	3.463	1.1919
1775	3.6989	1.628				1734	0.7909	1.1237	3.4663	1.2031
1776	3.7032	1.758				1735	0.7873	1.1597	3.4659	1.2209
1777	3.6541	1.6				1736	0.8378	1.0722	3.4583	1.1698
1778	3.6461	1.631				1737	0.8929	1.0964	3.4691	1.1388
1779	3.6917	1.706				1738	0.8637	1.1154	3.5077	1.0934
1780	3.6761	1.74				1739	0.8139	1.0511	3.4764	1.15
1781	3.6555	1.701				1740	0.9023	1.0392	3.4619	1.1523
1782	3.6939	1.709				1741	0.8701	1.0592	3.5078	1.1389
1783	3.6733	1.649				1742	0.848	1.0658	3.4569	1.1388
1784	3.6706	1.68				1743	0.8379	1.1	3.494	1.0854
1785	3.6876	1.69				1744	0.9025	1.0561	3.5517	1.1804
1786	3.6843	1.689				1745	0.8996	1.1219	3.5681	1.2313
1787	3.6713	1.681				1746	0.8863	1.0598	3.6028	1.1742
1788	3.6657	1.811				1747	0.8352	1.0148	3.5808	1.1605
1789	3.6627	1.805				1748	0.9262	1.0864	3.5455	1.2087
1790	3.7527	1.721				1749	0.8801	1.1403	3.5765	1.2193
1791	3.7773	1.853				1750	0.8033	1.1216	3.6042	1.2335
1792	3.8028	1.791				1751	0.8293	1.126	3.5743	1.2622
1793	3.8335	1.768				1752	0.7987	1.1409	3.5361	1.2123
1794	3.8186	1.683				1753	0.7989	1.1412	3.4854	1.2126
1795	3.7995	1.699				1754	0.7967	1.0502	3.4923	1.2462
1796	3.7591	1.747				1755	0.772	1.0808	3.5285	1.2021
1797	3.7489	1.7				1756	0.8407	1.0439	3.5434	1.1799
1798	3.7578	1.699				1757	0.7675	1.0537	3.5014	1.1515
1799	3.6735	1.689				1758	0.8535	1.1307	3.5028	1.187
1800	3.6557	1.706				1759	0.8118	1.1461	3.5435	1.2027
1801	3.6456	1.726				1760	0.802	1.1974	3.5589	1.2785
1802	3.6089	1.715				1761	0.7551	1.2446	3.599	1.2661
1803	3.6287	1.786				1762	0.7717	1.3016	3.6202	1.254
1804	3.6765	1.858				1763	0.8079	1.3036	3.6056	1.1552
1805	3.6903	1.885				1764	0.8354	1.2918	3.5772	1.1427
1806	3.6997	1.804				1765	0.838	1.2673	3.5643	1.1401
1807	3.7417	1.767				1766	0.8935	1.298	3.5444	1.1905
1808	3.7633	1.82				1767	0.8022	1.3597	3.5483	1.2142
1809	3.7535	1.914				1768	0.7939	1.3224	3.5824	1.1952
1810	3.7481	1.8				1769	0.8211	1.2842	3.6129	1.1897
1811	3.7061	1.741				1770	0.7914	1.3412	3.6728	1.1845
1812	3.7158	1.731				1771	0.8465	1.2938	3.6824	1.1142
1813	3.703	1.765				1772	0.8302	1.2393	3.7254	1.134
1814	3.6768	1.796				1773	0.7977	1.2365	3.7412	1.1732
1815	3.6889	1.777				1774	0.7769	1.2833	3.7177	1.1041
1816	3.6881	1.735				1775	0.7378	1.2499	3.6989	1.0984
1817	3.7304	1.832				1776	0.661	1.2226	3.7032	1.088
1818	3.7863	1.814				1777	0.7344	1.2252	3.6541	1.1204
1819	3.8001	1.773				1778	0.7764	1.3064	3.6461	1.1614
1820	3.7648	1.829				1779	0.7793	1.3343	3.6917	1.1495
1821	3.7891	1.882				1780	0.7864	1.3335	3.6761	1.1114
1822	3.8271	1.815				1781	0.7768	1.3534	3.6555	1.122
1823	3.7984	1.748				1782	0.7823	1.3579	3.6939	1.1317
1824	3.7656	1.705				1783	0.7197	1.271	3.6733	1.1147
1825	3.7683	1.779				1784	0.7703	1.2661	3.6706	1.0831
1826	3.753	1.798				1785	0.7719	1.2447	3.6876	1.1686
1827	3.7917	1.767				1786	0.8453	1.2173	3.6843	1.104
1828	3.7625	1.713				1787	0.874	1.2028	3.6713	1.1458
1829	3.7445	1.852				1788	0.8785	1.1329	3.6657	1.1498
1830	3.7309	1.753				1789	0.8481	1.1387	3.6627	1.199
1831	3.7631	1.701				1790	0.8023	1.1139	3.7527	1.1502
1832	3.7308	1.818				1791	0.7715	1.1086	3.7773	1.1565
1833	3.7312	1.695				1792	0.7807	1.101	3.8028	1.1771
1834	3.6818	1.821				1793	0.776	1.1806	3.8335	1.1688
1835	3.6436	1.86				1794	0.818	1.1719	3.8186	1.2195
1836	3.6056	1.87				1795	0.7906	1.1451	3.7995	1.296
1837	3.6261	1.745				1796	0.8102	1.1432	3.7591	1.2444
1838	3.6663	1.881				1797	0.8776	1.1644	3.7489	1.2608
1839	3.6511	1.807				1798	0.9415	1.1268	3.7578	1.2459
1840	3.6323	1.749				1799	0.9827	1.0828	3.6735	1.2354
1841	3.6761	1.675				1800	0.8985	1.1148	3.6557	1.2088
1842	3.6599	1.787				1801	0.8953	1.1104	3.6456	1.2722
1843	3.6023	1.78				1802	0.8494	1.1369	3.6089	1.2729
1844	3.554	1.654				1803	0.79	1.1171	3.6287	1.2652
1845	3.6174	1.642				1804	0.8002	1.1516	3.6765	1.2747
1846	3.6374	1.686				1805	0.8325	1.0897	3.6903	1.2625
1847	3.6253	1.804				1806	0.7996	1.1346	3.6997	1.2274
1848	3.6629	1.785				1807	0.76	1.1215	3.7417	1.1827
1849	3.7061	1.735				1808	0.7428	1.1429	3.7633	1.2042
1850	3.7154	1.709				1809	0.7771	1.2051	3.7535	1.1902
1851	3.7057	1.701				1810	0.8146	1.2068	3.7481	1.196
1852	3.6516	1.624				1811	0.8295	1.1919	3.7061	1.2311
1853	3.6242	1.64				1812	0.8102	1.1694	3.7158	1.2732
1854	3.5793	1.698				1813	0.7496	1.2132	3.703	1.2529
1855	3.6012	1.706				1814	0.7791	1.1652	3.6768	1.213
1856	3.621	1.605				1815	0.7776	1.1488	3.6889	1.1669
1857	3.6183	1.714				1816	0.775	1.1448	3.6881	1.1946
1858	3.6559	1.755				1817	0.8169	1.1249	3.7304	1.2101
1859	3.6485	1.693				1818	0.7686	1.072	3.7863	1.1783
1860	3.6785	1.648				1819	0.756	1.1051	3.8001	1.1633
1861	3.7212	1.648				1820	0.704	1.1282	3.7648	1.24
1862	3.7371	1.82				1821	0.7901	1.1815	3.7891	1.2672
1863	3.7273	1.689				1822	0.7332	1.1716	3.8271	1.2362
1864	3.677	1.673				1823	0.7591	1.174	3.7984	1.2779
1865	3.6459	1.687				1824	0.8819	1.1938	3.7656	1.2462
1866	3.6309	1.741				1825	0.8281	1.0878	3.7683	1.1966
1867	3.6217	1.728				1826	0.7976	1.1209	3.753	1.1407
1868	3.6822	1.716				1827	0.7808	1.132	3.7917	1.1996
1869	3.6691	1.785				1828	0.8223	1.1961	3.7625	1.2165
1870	3.6899	1.773				1829	0.8073	1.1555	3.7445	1.1985
1871	3.6514	1.794				1830	0.7869	2.2839	3.7309	1.2087
1872	3.6625	1.799				1831	0.657	2.2732	3.7631	1.2056
1873	3.7017	1.956				1832	0.6529	2.3103	3.7308	1.2377
1874	3.7069	1.884				1833	0.8013	2.3502	3.7312	1.271
1875	3.7518	1.753				1834	0.8146	2.3823	3.6818	1.2897
1876	3.7638	1.72				1835	0.8409	2.3661	3.6436	1.2831
1877	3.7558	1.736				1836	0.8648	2.3191	3.6056	1.3257
1878	3.7304	1.8				1837	0.875	2.3366	3.6261	1.3471
1879	3.7085	1.696				1838	0.9246	2.3408	3.6663	1.2813
1880	3.6863	1.775				1839	0.861	2.315	3.6511	1.3047
1881	3.688	1.865				1840	0.8603	2.3719	3.6323	1.3766
1882	3.6792	1.652				1841	0.8018	2.4105	3.6761	1.3545
1883	3.6406	1.835				1842	0.8409	2.4297	3.6599	1.3608
1884	3.6426	1.648				1843	0.8871	2.4169	3.6023	1.3284
1885	3.6671	1.761				1844	0.8509	2.3987	3.554	1.3156
1886	3.656	1.745				1845	0.7913	2.4565	3.6174	1.3125
1887	3.6322	1.678				1846	0.8194	2.4763	3.6374	1.3246
1888	3.622	1.739				1847	0.8439	2.4712	3.6253	1.3708
1889	3.6149	1.701				1848	0.8713	2.4863	3.6629	1.3373
1890	3.6191	1.746				1849	0.9019	2.4599	3.7061	1.3426
1891	3.6307	1.568				1850	0.8584	2.4396	3.7154	1.3344
1892	3.6236	1.681				1851	0.8311	2.4585	3.7057	1.37
1893	3.6682	1.689				1852	0.8176	2.4321	3.6516	1.3207
1894	3.6975	1.662				1853	0.8383	2.4281	3.6242	1.2602
1895	3.7019	1.662				1854	0.8379	2.4036	3.5793	1.2763
1896	3.713	1.743				1855	0.7818	2.4077	3.6012	1.2251
1897	3.7112	1.874				1856	0.798	2.3916	3.621	1.2708
1898	3.6848	1.818				1857	0.8216	2.4151	3.6183	1.2959
1899	3.6549	1.75				1858	0.8009	2.3869	3.6559	1.3232
1900	3.5989	1.703				1859	0.8837	2.3621	3.6485	1.3065
1901	3.6731	1.676				1860	0.7914	2.3958	3.6785	1.259
1902	3.7036	1.81				1861	0.8881	2.3674	3.7212	1.2431
1903	3.7317	1.744				1862	0.8849	2.3826	3.7371	1.2815
1904	3.7151	1.721				1863	0.864	2.3635	3.7273	1.2374
1905	3.7117	1.661				1864	0.851	2.3448	3.677	1.2179
1906	3.7236	1.651				1865	0.795	2.3568	3.6459	1.2521
1907	3.7768	1.694				1866	0.8948	2.3269	3.6309	1.2389
1908	3.774	1.736				1867	0.9188	2.3545	3.6217	1.1628
1909	3.753	1.83				1868	0.8795	2.4021	3.6822	1.1248
1910	3.7559	1.786				1869	0.9814	2.3203	3.6691	1.167
1911	3.7765	1.858				1870	1.031	2.3119	3.6899	1.1826
1912	3.8059	1.793				1871	1.0253	2.3232	3.6514	1.1704
1913	3.8362	1.88				1872	1.0234	2.3219	3.6625	1.1975
1914	3.8094	1.878				1873	1.0563	2.3093	3.7017	1.2113
1915	3.8563	1.786				1874	1.1095	2.2983	3.7069	1.2192
1916	3.8508	1.867				1875	1.0634	2.3026	3.7518	1.3254
1917	3.8606	1.949				1876	1.0612	2.286	3.7638	1.2588
1918	3.895	1.84				1877	1.0912	2.3373	3.7558	1.2082
1919	3.8468	1.805				1878	0.8941	2.3358	3.7304	1.1788
1920	3.7774	1.827				1879	0.8968	2.32	3.7085	1.2285
1921	3.7818	1.768				1880	0.8686	2.3688	3.6863	1.2173
1922	3.8139	1.871				1881	0.7974	2.4057	3.688	1.2281
1923	3.7609	1.792				1882	0.8013	2.351	3.6792	1.2094
1924	3.7919	1.836				1883	0.8406	2.3425	3.6406	1.2447
1925	3.7846	1.791				1884	0.8405	2.3456	3.6426	1.2009
1926	3.7573	1.899				1885	0.8347	2.3467	3.6671	1.2073
1927	3.7716	1.818				1886	0.8452	2.3161	3.656	1.2093
1928	3.7051	1.728				1887	0.8024	2.3142	3.6322	1.2268
1929	3.7167	1.71				1888	0.8063	2.3287	3.622	1.2146
1930	3.7004	1.709				1889	0.8732	2.3536	3.6149	1.2299
1931	3.676	1.617				1890	0.8561	2.3823	3.6191	1.2747
1932	3.6875	1.567				1891	0.8243	2.4488	3.6307	1.3089
1933	3.7437	1.573				1892	0.8924	2.4304	3.6236	1.2719
1934	3.7032	1.584				1893	0.9111	2.443	3.6682	1.2492
1935	3.6466	1.651				1894	0.8695	2.4526	3.6975	1.2412
1936	3.6217	1.611				1895	0.8647	2.4364	3.7019	1.1889
1937	3.648	1.74				1896	0.8823	2.383	3.713	1.1392
1938	3.6484	1.789				1897	0.7792	2.4459	3.7112	1.1708
1939	3.6608	1.681				1898	0.7929	2.4375	3.6848	1.1412
1940	3.6436	1.642				1899	0.8085	2.3902	3.6549	1.2114
1941	3.6821	1.634				1900	0.8625	2.4333	3.5989	1.1575
1942	3.6918	1.764				1901	0.8855	2.5029	3.6731	1.202
1943	3.7168	1.659				1902	0.8843	2.4883	3.7036	1.246
1944	3.6925	1.665				1903	0.8988	2.4607	3.7317	1.218
1945	3.6515	1.819				1904	0.8834	2.4705	3.7151	1.2595
1946	3.7124	1.62				1905	0.949	2.5121	3.7117	1.2849
1947	3.6886	1.69				1906	0.8601	2.5043	3.7236	1.3495
1948	3.6873	1.732				1907	0.8215	2.5447	3.7768	1.3046
1949	3.6872	1.667				1908	0.8566	2.5403	3.774	1.3332
1950	3.6869	1.629				1909	0.8953	2.5119	3.753	1.278
1951	3.6995	1.661				1910	0.8361	2.5094	3.7559	1.2312
1952	3.6881	1.641				1911	0.8079	2.5514	3.7765	1.2452
1953	3.6691	1.696				1912	0.7636	2.5696	3.8059	1.2606
1954	3.7307	1.644				1913	0.7263	2.5291	3.8362	1.2727
1955	3.7258	1.665				1914	0.7641	2.5243	3.8094	1.3059
1956	3.7359	1.709				1915	0.7071	2.5625	3.8563	1.2755
1957	3.7042	1.645				1916	0.739	2.5659	3.8508	1.3097
1958	3.6478	1.626				1917	0.684	2.5645	3.8606	1.3313
1959	3.6928	1.751				1918	0.6825	2.5656	3.895	1.2886
1960	3.6662	1.642				1919	0.695	2.5504	3.8468	1.2962
1961	3.6412	1.655				1920	0.688	2.5135	3.7774	1.3228
1962	3.6323	1.638				1921	0.7158	2.5329	3.7818	1.3219
1963	3.6356	1.682				1922	0.7159	2.5238	3.8139	1.3873
1964	3.6302	1.642				1923	0.735	2.5045	3.7609	1.3438
1965	3.6314	1.689				1924	0.6668	2.4979	3.7919	1.3663
1966	3.6124	1.649				1925	0.6835	2.5381	3.7846	1.431
1967	3.5331	1.711				1926	0.6983	2.54	3.7573	1.4236
1968	3.5269	1.703				1927	0.6987	2.5545	3.7716	1.3527
1969	3.54	1.624				1928	0.7145	2.5543	3.7051	1.3496
1970	3.5287	1.822				1929	0.7897	2.5367	3.7167	1.3351
1971	3.537	1.634				1930	0.8185	2.4887	3.7004	1.3023
1972	3.5577	1.846				1931	0.8059	2.4538	3.676	1.3386
1973	3.5612	1.771				1932	0.7837	2.4285	3.6875	1.3897
1974	3.6092	1.61				1933	0.8195	2.4337	3.7437	1.4489
1975	3.6212	1.714				1934	0.8046	2.4317	3.7032	1.4539
1976	3.6092	1.689				1935	0.8662	2.4348	3.6466	1.4729
1977	3.5872	1.724				1936	0.7438	2.4337	3.6217	1.4702
1978	3.5714	1.63				1937	0.7977	2.4218	3.648	1.4652
1979	3.5937	1.687				1938	0.8205	2.4395	3.6484	1.4294
1980	3.6233	1.707				1939	0.8229	2.4225	3.6608	1.4119
1981	3.7064	1.617				1940	0.8071	2.4434	3.6436	1.391
1982	3.6709	1.682				1941	0.9138	2.4862	3.6821	1.3914
1983	3.6192	1.777				1942	0.9306	2.5151	3.6918	1.4854
1984	3.6075	1.69				1943	0.9879	2.4896	3.7168	1.4438
1985	3.6155	1.664				1944	0.949	2.466	3.6925	1.3628
1986	3.5898	1.701				1945	0.9733	2.5115	3.6515	1.406
1987	3.5932	1.674				1946	0.947	2.5005	3.7124	1.3579
1988	3.5869	1.728				1947	0.9547	2.4843	3.6886	1.3809
1989	3.5744	1.754				1948	0.946	2.4762	3.6873	1.4182
1990	3.5655	1.719				1949	0.9406	2.4723	3.6872	1.4443
1991	3.6123	1.831				1950	0.8882	2.4919	3.6869	1.4861
1992	3.6143	1.648				1951	0.8453	2.5219	3.6995	1.5043
1993	3.6057	1.72				1952	0.865	2.523	3.6881	1.5196
1994	3.5613	1.712				1953	0.9104	2.5672	3.6691	1.4936
1995	3.5298	1.663				1954	0.9985	2.5551	3.7307	1.4525
1996	3.5765	1.723				1955	0.9703	2.5324	3.7258	1.4531
1997	3.6162	1.695				1956	0.9965	2.5314	3.7359	1.4815
1998	3.5907	1.744				1957	0.974	2.5533	3.7042	1.4688
1999	3.6425	1.718				1958	0.8964	2.5065	3.6478	1.4969
[truncated: 10,239 more rows]
